# Supplementary material
Source: publisher figshare collection journal article supplement (https://gsajournals.figshare.com/ndownloader/files/14078102)
Supplement: Supplementary file 1 [file 14078102]

## Sheet: NonClustered
	S. pombe Genomic Screen Data
					Multiple trials of plate growth assays to screen the genomic deletion mutant library were performed. One set was digitized for quantitative analysis. Sensitive strain lists were constructed based on the visual inspection of the cell growth of the each strain observed in several growth assays and confirmed by the quantitative analysis. In constructing sensitive strain lists in S10A-C combining the…
Gene Deleted	0.3 mM BHA (GSV)	0.6 mM BHT (GSV)	0.6 mM BPA (GSV)
zhf1	0.8	0.77	1.11
pdt1	0.2	0.94	1.03
SPAC323.04	0.75	0.98	0.89
mfs2	0.44	1.07	0.88
SPAC3H1.06c	0.37	1.16	0.88
ubi3	0.23	0.78	0.43
SPCC576.17c	0.38	0.8	0.59
uep1	0.75	0.89	0.62
ufd2	0.47	1.02	0.58
pck1	0.64	0.93	0.47
shk2	0.77	0.98	0.57
cta3	0.67	0.93	0.72
pmr1	0.7	1.08	0.84
kha1	0.85	1.05	0.69
SPAC15A10.06	0	0.82	0.8
SPAC24B11.12c	0.08	0.99	0.04
cta5	0.95	0.93	0.63
sod22	0.73	0.97	0.56
SPAC3A12.06c	0.81	0.94	0.6
yam8	0.92	1.05	0.48
trk1	0.06	0.8	0.13
hmt1	0.86	0.98	0.48
cis4	0.44	0.74	0.48
SPAC1635.01	0.24	0.85	0.9
SPBC1105.08	0.68	1.1	0.81
SPBC16A3.17c	0.87	1.12	0.76
SPCC330.07c	0.78	1.17	0.74
SPCC613.02	0.63	1.12	0.59
SPCC1840.12	0.76	0.97	0.59
thi9	0.64	1.06	0.56
SPAC12G12.12	0.35	0.96	0.55
SPAC17G6.15c	0.79	1.07	0.57
SPAC24H6.11c	0.76	1.12	0.53
SPAC869.05c	0.75	1.11	0.5
SPBC543.05c	0.74	0.9	0.47
SPAC29A4.13	0.66	0.98	0.91
SPAC6B12.04c	0.74	1.04	0.73
SPAC922.03	0.76	1.08	0.73
SPBC1773.03c	0	0	0.57
SPBC354.15	0.9	1.1	0.54
SPBC582.08	0.85	0.95	0.56
SPBC725.01	0.62	1.12	0.54
SPCC569.07	0.57	0.94	0.51
mug58	0.52	1.21	0.53
SPCC777.04	0.72	1.19	0.47
SPCC794.03	0.85	1.17	0.55
itr1	0.67	0.97	0.49
SPAC823.13c	0.75	0.95	0.94
bzz1	0.81	1.03	0.81
tea4	0.21	0.63	0.74
hse1	99	99	0.64
alg12	0.38	1.11	0.61
SPBC36B7.08c	0.4	1.05	0.5
pex11	0.82	1.16	0.53
SPBP16F5.05c	0.57	0.93	0.54
SPCC126.08c	0.39	1.07	0.62
SPCC126.12	0.81	1.2	0.59
mug137	0.8	1.16	0.59
SPAC27F1.05c	0.75	1.08	0.47
SPAC105.02c	0.35	0.84	0.86
SPAC14C4.11	0.77	1	0.75
knd1	0.76	0.99	0.67
rho4	0.72	0	0.64
ecm29	0	0	0
tco1	0.7	0.94	0.59
mok11	0.83	1.15	0.51
jmj1	0.76	1.19	0.56
nhp6	0.73	1.23	0.61
SPAC6C3.08	0.91	1.2	0.58
SPAC6G9.15c	0.72	1.17	0.54
sfp47	0.33	0.79	0.41
ctf18	0.49	0.9	0.79
cbf11	0.55	0.77	0.7
bem46	0	0	0
hht1	0.16	0.3	0.22
hht2	0	0.65	0.35
hhf1	0.17	0.77	0.52
hta1	0	0	0
hta2	0	0	0
mok12	0.04	99	0.52
mok13	0.43	0.52	0.5
mok14	0.57	1.11	0.55
rgf2	0.6	0.59	0.51
SPACUNK4.08	0.57	0.95	0.61
oma1	99	99	0.76
mag2	0	0	0
apn2	0	0	0
rhp7	0	0	0
dmc1	0.25	0.84	0.11
rec20	0	0	0
rec7	0.03	0.6	0.57
tsn1	0.11	0.57	0.56
pub2	0.63	0.86	0.64
SPAC1F3.10c	0.73	0.42	0.66	oct1
ubp7	0.78	0.77	0.86
SPAC23G3.12c	0.73	0.75	0.81
SPAC24C9.08	0.75	0.8	0.91
dph1	0.73	0.76	0.89
SPAC3H1.05	0.92	0.82	1.21
aap1	0.45	0.41	1.26
SPAC167.07c	0.65	0.79	1.16
SPAC589.10c	0.89	0.89	1.12
SPAC607.06c	0.33	2.02	1.04
raf2	0	99	0.69
cul3	0.21	99	0.57
isp6	0	99	0.26
pmt3	0.73	99	0.89
pof3	0.56	99	0.38
pop2	0.74	99	0.82
pub1	0.09	99	0.13
psp3	0	99	0.39
icp55	0.51	99	1.13
SPAC13A11.05	0	99	0.09
phb1	0.06	99	1.23
mde10	0.82	0.56	1.02
SPAC2F7.09c	0.7	0.8	0.73
mtg1	0.78	0.85	0.78
dsc3	0.13	0.79	0.06
mss1	0.7	0.76	0.86
rho3	0.84	0.65	0.93
SPAC6F6.03c	0.7	0.71	0.91
spo5	0.7	0.21	1.19
rga1	0.32	0.21	1.19
iqw1	0.37	99	1.17
SPCC622.14	0.8	99	1.11
SPCC777.02	0.29	99	1.22
SPCC965.10	0.65	99	1.03
SPACUNK4.11c	0.78	0.72	0.74
SPAC8C9.11	0.48	0.84	0.8
SPAC824.02	0.59	0.21	0.79
SPAC11E3.11c	0	99	0.86
SPAC1952.17c	0.79	0.8	0.91
gyp51	0.15	0.86	0.9
gyp7	0.36	0.35	1.1
rga5	0.46	0.41	1.2
SPBC4B4.04	0.66	0.77	1.15
gyp1	0	0.81	1.26
SPAC1B3.04c	0.45	0.05	1.26
rho5	0.08	0.36	1.04
SPBC17G9.12c	0.34	0.51	0.79
SPBC1734.07c	0.28	0.61	0.77
pof10	0.56	0.64	0.88
SPBC16H5.08c	0.18	0.63	0.95
SPBC16H5.04	0.57	99	0.91
zrg17	0	0	0.87
SPBC16A3.08c	0.83	0.9	1.11
ash2	0.3	0.85	1.17
shy1	0.9	0.85	1.03
fis1	0	0.73	1.13
pmc1	0	0.66	1.05
alo1	0.68	0.4	1
SPBC30B4.02c	0.64	0.55	0.73
pdp1	0.05	0.7	0.78
SPBC28F2.08c	0	0	0
SPBC25H2.16c	0.1	99	0.82
mrs2	0.46	0.74	1.03
SPBC21C3.09c	0.82	0.75	1.04
yox1	0.15	0.83	1.16
pdp2	0.67	0.78	1.21
SPBC19F8.04c	0.69	0.64	1.14
SPBC19F8.02	0.56	0.78	1.01
SPBC1861.05	0.15	0.48	1.13
mak10	0.74	0.93	1.01
SPBP19A11.02c	0	0	0
SPBP16F5.08c	0.73	0.72	0.79
SPBC8D2.02c	0.36	0.71	0.96
ibp1	0.69	0.77	0.79
SPBC216.01c	0.26	0.76	0.99
SPBC713.03	0.52	0.79	1
SPBC577.03c	0.45	0.94	1.03
pxl1	0	0.72	1.03
SPBC409.19c	0.08	0.69	1.03
SPBC365.01	0.51	0.75	1.09
SPBC30D10.14	0.76	0.75	1.03
SPBC30B4.06c	0.47	0.6	1.02
SPBC1198.07c	0.61	0.79	0.86
SPCC1442.14c	0.67	0.82	1.03
vtc4	0.86	0.79	1.02
fft2	0.55	0.79	1.02
SPCC1020.07	0.72	0.8	1.07
gal10	0	0	0
SPBPB2B2.11	0.81	0.94	1.17
SPBPB2B2.05	0.66	0.9	1
SPBP35G2.11c	0.45	0.82	1.05
twf1	0.78	0.95	1.07
ppk33	0.68	0.89	0
amk2	0.74	0.91	0.49
spo4	0.58	0.83	0.1
SPAC22H10.09	0.4	0.39	0.86
meu10	1.34	1.46	0.29
ppk34	0.79	1.13	0.5
swi2	0.79	0.96	0.17
msh3	0	0	0
pom1	0	0	0
SPAC23G3.05c	0.96	0.89	0.42
sck2	0	0.85	0.32
ppk8	1.61	1	1.59
lsk1	0.69	0.91	0.15
pit1	0.95	0.88	0.35
ppk14	0	0	0
ppk23	0.94	0.94	0.17
ppk25	0	0	0
SPBC543.02c	0.69	1.06	1.14
ppk29	0	0	0
ppk31	1.01	1.02	0.53
mde3	1.02	1.02	0.06
ppk32	0.92	0.99	0
cki3	0.06	0.58	0.72
mug81	0.73	0.74	0
clr4	0.75	0.75	0.15
meu13	0.77	0.92	0.86
mfm2	0.34	1.03	0.93
swr1	0.9	0.92	0.95
mei4	0.88	1.2	0.6
scd1	0.94	0.99	0.08
csk1	0.07	0.98	0.37
kin1	0.21	0.67	1.11
ppk2	0.84	0.9	0.62
hri1	1.05	0.91	0.26
sol1	99	0.75	0.52
nut2	99	1	0.39
SPBC32F12.07c	0	0.35	1.21
SPBC3B9.05	0.93	0.87	0.22
SPBC530.05	0.74	0.77	0
SPCC18.03	0.61	0.92	0.95
SPCC1223.01	0.81	1.09	0.64
rec15	0.59	1.03	0.41
rtn1	1.02	0.97	0.16
can1	0.95	1.02	0
SPBC947.06c	0.8	1.09	0.43
SPCC965.13	0.43	0.84	0.56
SPBC16G5.17	0.74	0.88	0.27
png2	0.87	0.8	0.56
SPBC1709.14	0.87	0.87	0.92
hop1	0.79	0.83	0.47
hrd1	0.86	0.86	0.36
SPBC17D11.04c	0.53	0.9	0.87
SPBC1861.07	0	0.88	0.17
SPBC19G7.04	0	0.68	0.31
SPBC21D10.09c	0.82	0.92	0.2
SPBC25B2.03	0.84	0.95	0.29
SPBC2A9.04c	0.94	1.01	0.28
clr1	0.57	1.05	0.22
SPAC3C7.04	99	0.95	1.03
snt2	0	0.94	0.89
SPAC3H8.08c	99	0.93	1.59
prz1	0.85	0.92	0.72
SPAC57A7.09	0.8	0.9	0.1
cpd1	0.98	1.03	0
SPAPB1A11.04c	0.67	0.99	0
SPBC1271.05c	99	1.15	0.45
SPBC14F5.10c	0	1.05	0
SPBC15C4.06c	0.87	0.94	0.72
cha4	0.82	0.98	0
SPBC16G5.16	0.65	0.98	0.49
fhl1	0.63	1.04	0.45
upf1	0	99	0.79
tup11	1	0.87	0
rfp1	0.83	0.87	0.76
SPAC19B12.11c	0.8	0.85	0.56
SPAC1F7.11c	1.02	0.94	0.37
snf5	99	1.14	0
SPAC23A1.07	0	1.05	0.58
otu1	0	1.08	0.59
SPAC26F1.08c	0.39	1.07	0.76
SPAC2H10.01	0.27	1.09	0.81
meu34	0.84	1.09	0.76
sco1	0	0	0
SPBC13E7.11	0.68	0.77	0.79
cwc27	0.96	0.86	0.81
SPBC3E7.05c	0.91	0.85	0.51
SPAC12B10.09	1.09	0.89	0.22
SPAC4G8.08	0	0	0
SPAC4G9.20c	0.87	0.93	0.53
SPAC8C9.12c	0.83	1.17	0.9
cuf1	0.83	0.94	0.32
ppt1	0.65	99	0
coq4	99	99	0
osm1	0.67	1.05	0.6
SPAC1805.02c	0.37	1.08	0.41
erg5	0.52	1.05	0.72
alg10	0.75	0.95	0
SPAC27D7.06	0.65	0.83	0.53
atp11	0.93	0.89	0.74
atp10	0.36	99	1.22
SPAC869.02c	0.99	0.9	0.61
atp12	0.89	0.87	0.89
ptc3	0.74	0.93	0.65
sds21	0.91	0.95	0.39
SPBC725.05c	1.18	0.87	0.48
rad1	0.76	0.98	0.3
rad13	1.4	0.88	0.42
pka1	0.28	0.9	0.23
psk1	0.48	0.96	0.57
pyp3	0.81	0.98	0.62
spk1	0.61	0.87	0.63
ste4	0.65	0.83	0.52
ste7	0.3	0.8	0.72
gpd1	0.9	0.89	0.67
srb11	0.56	0.78	0.2
rrf1	0.82	0.84	0.4
hip4	0.58	0.83	0.05
SPBP4H10.16c	0.64	0.89	0.55
spd1	2.04	1	0.02
tel1	0.84	0.98	0
wos2	0.16	0.92	0.71
spo6	0.85	0.91	0.87
rct1	0.39	0.92	0.57
pzh1	0.34	0.91	0.58
mug93	0.84	0.79	0.47
ptc2	0.84	0.83	0.13
pds5	0	0	0
ssb3	0.77	0.9	0.44
chp1	0.39	0.8	0.39
cid1	0.96	0.86	0.87
mal3	1.18	0.78	0.71
rep2	0.09	1.06	0.25
crb2	0.46	0.96	0.27
sat1	0.05	0.95	0.16
skb5	0.86	0.93	0.85
man1	0.67	0.86	0.77
SPAC2C4.07c	0	0	0
sen1	1.17	0.81	1.03
SPBC106.12c	0.88	1.28	0.26
SPBC3B8.06	0.71	0.82	0.55
ctf1	0	0	0
SPBC902.04	0.56	0.74	0.08
set1	0.43	0.49	0.11
vgl1	1.17	0.8	0.17
snd1	0.1	0.96	0.73
nup184	0.34	0.91	0.44
seh1	0.25	0.93	0.61
SPAC4F8.11	0.61	0.87	0.29
imp1	0.63	0.84	0.45
sec63	0	0.82	0.94
mlo3	0	0	0
rnp24	0.66	0.81	0.21
sce3	0.91	0.6	0.09
cip2	0.54	0.77	0.03
SPAC1527.03	0.72	0.81	0.35
crp79	0.63	0.91	0.43
SPAC17H9.04c	0.56	1.01	0.73
SPAC328.05	0.56	0.9	0.52
nab3	0.84	99	0
SPAC4G8.03c	1.51	99	0.36
SPAC57A7.13	0.72	0.91	0.73
SPAC6G9.14	0.88	0.77	0.29
fkbp39	0.97	0.69	0.73
SPAC227.05	0.38	0.75	0.25
SPAC227.10	0	0.71	0.41
cyp1	0.68	0.73	0.48
cyp7	0.86	0.77	0.67
SPBC1D7.01	0.81	0.79	0.12
fkh1	0.59	0.99	0.95
ppk26	0	0.88	0.57
SPAC1B1.04c	1.06	0.95	0.76
doa10	0.62	0.91	0.41
SPBC29A10.09c	0.27	0.89	0.92
mei2	0.99	0.88	0.4
rps402	0.91	0.71	0.41
SPAC20H4.09	0.49	0.86	0.58
cyp3	0.93	0.66	0.38
SPAC17H9.14c	0.29	0.75	0.57
rps2401	99	0.78	0.29
SPCC162.01c	0.61	1.23	0.61
grx1	0.78	0.98	0.37
grx3	0	1.1	0.46
tom7	0	99	0.87
SPCC16C4.06c	0.47	0.42	2.1
SPCC18B5.05c	0.8	0.61	1.48
SPCC965.14c	0	0	0
thi2	0.87	0.63	1.2
nmt1	1.1	0.57	2.03
thi4	0.85	0.94	0.01
rpl2302	0.78	0.8	1.33
rpl2502	1.03	0	1.39
SPAC1610.02c	1.08	0	1.41
SPBC83.05	0.91	0.43	1.14
nop52	0.49	0.56	0.66
SPAC1296.01c	0.86	0.7	1.77
wis1	0	0	0
aph1	0.54	0.85	0.25
exo2	1.1	0.36	0
ndk1	0	0	0
urg2	0.96	1.46	0.93
rex3	1	0.47	1.12
pnu1	1.56	0	0.68
SPAC22E12.03c	0.52	0	1.33
SPAC29B12.14c	0.72	0	0
SPBC11C11.10	99	0.25	0.88
SPCC1672.03c	0.84	0.03	0.59
pof11	0.95	0.22	1.41
SPAC343.04c	0	0	0
caf4	0	0	0
dad1	0	0	0
SPAC1F12.02c	0.89	0.12	1.4
spn3	0.56	0.58	0.63
SPAC13G6.09	0.75	0.49	0.73
SPBC16D10.08c	0.82	0.72	1.25
pmp3	0.9	0.79	6.18
ats1	0.63	1.08	1
gms1	0.41	99	0
omh5	0.83	0.55	1.45
ubp4	0.63	0.62	0.12
SPBC354.09c	0.53	0	2.33
fma1	1.38	0.66	0.29
lub1	0.51	0.21	0.36
ubp3	1.84	1.08	0
mug30	0	0	0
SPCC1442.07c	0.49	0.82	0.9
ubp16	0	0	0
clr3	0.84	1.02	3.52
rik1	0	0	0
SPBC1773.02c	0.65	0.71	1.04
swd1	0.33	0.61	0.72
SPBC1683.06c	1.06	0.61	0.79
ura5	0.72	0.87	0.35
SPBC800.11	0.68	0.89	0.83
gnr1	0.35	0.86	1.32
SPCC162.11c	0.08	0.96	1.13
SPAC17G8.02	1.42	1.05	0.74
apt1	0.96	1.01	0.69
met6	0.77	0.97	1.53
lys3	0.75	1.04	0
lys2	0.67	0.74	1.5
his5	0.91	1.01	2.04
fma2	0.51	0.65	1.38
pcr1	0.67	1.08	0
shd1	0	0	0
SPAC4H3.06	0	0.91	0.23
cti1	0	0	0
rev7	0	0	0
cho1	0	0	0
gpd2	0.97	1.21	1
SPBC1685.05	0	0.66	8.56
ubp11	0.44	0.97	2.89
SPBC1E8.02	0	0	0
SPBC337.07c	0	0	0.02
SPBC1683.02	99	0.46	0
SPAC1142.02c	0.67	0.87	0.92
SPAC1142.01	0.79	0	0.92
ppr5	0.62	0.88	1.35
rmt3	0.77	0.88	0.93
SPAC8C9.05	0.56	1.25	0.8
SPBC18H10.07	5.1	0.85	1.26
usp103	0	0	0
grx2	0.88	1.19	1.11
grx5	0.79	0.22	2.4
SPCC1739.01	0.8	0.25	0.72
cat1	0.85	1.1	1.84
ubc16	0.83	0.37	0.58
sft2	0.73	0.13	0.9
alm1	0.77	0.52	1.68
SPAC1486.01	0.61	0.17	0.8
SPAC13G7.11	0.59	0.99	0.51
arb2	0.79	0.68	0.95
upf3	0.81	0.57	0.48
SPBC1348.01	0.73	0.69	0.72
SPAC11E3.12	0	0	0
SPAC11E3.10	0.26	0.41	1.25
csn3	0.71	0.96	0.52
caf16	1.12	0.98	0.58
SPAC1D4.01	0.61	1.01	0.16
SPAC18B11.08c	1.02	0.99	0.6
SPAC18B11.09c	0.96	1.03	0.18
SPAC17C9.02c	0.76	1.12	0.48
SPAC17A5.08	0.69	0.86	0.34
met14	99	1.01	0.19
cox24	0.75	0.92	0.64
SPAC1687.21	0.73	99	0.55
SPAC1610.01	0.3	1.06	0.52
rps1001	1.12	0.72	0.8
psd3	1.07	0.84	0.05
gcv1	1.14	99	0.04
pom2	0.85	1.09	0.17
SPAC2C4.09	0.93	0	0.08
SPAC29A4.09	0.99	1.07	0.59
SPAC29A4.14c	0.57	0.66	0.54
SPAC29A4.17c	0.77	0.48	0.56
SPAC24B11.14	99	1.19	0.37
hat1	0.54	1.38	0.19
SPAC22H10.02	0.39	1.2	0.25
SPAC22F8.03c	99	1.26	0.23
set8	1.04	0.92	0.03
SPAC3C7.02c	1.03	1.02	0.28
SPAC3C7.01c	1.12	0.96	0.23
cys12	99	0.96	0.14
SPAC3A12.13c	99	0.94	0.3
SPAC3A11.03	99	1.08	0.31
mvp1	0.65	0.89	0.44
SPAC3A11.07	0.66	1.07	0.05
SPAC3A11.11c	0.6	1.13	0.33
rds1	0.6	1.14	0.82
met11	0.49	1.14	0.55
SPAC1786.01c	0.76	1.23	0.87
fcf2	99	0.94	0.02
nsk1	1.09	0.91	0
rpl4101	1.04	0.7	0.36
tps2	99	99	0.11
SPAC3G6.07	0.94	0.84	0.13
SPAC3G6.05	0.41	0.67	0.03
SPAC3G6.03c	0.65	0.81	0.3
spo12	1.65	0.95	0.18
ucp6	0.55	0.97	0.14
SPAC3F10.09	0.63	1.02	0.34
mug113	0.74	1.21	0.18
SPAC3C7.13c	0	0.72	0.68
SPAC4D7.07c	0.91	0.78	0.02
SPAC4D7.02c	1.17	0.79	0.08
cwf21	0.59	0.64	0.43
SPAC4A8.02c	0.48	1.05	0
mde5	0.84	0.89	0
SPAC458.06	0.44	99	0
SPAC17D4.04	0.17	1	0.25
SPAC3H8.04	0.65	1.06	0.55
SPAC13A11.06	0.45	1.16	0.63
aar2	99	1.01	0.81
SPAC3H1.14	99	1.73	0.17
aru1	0.55	1.21	0.2
vps26	0.31	0.84	0
SPAC4G9.12	0.92	0.83	0.02
SPAC4G8.07c	0.88	0.96	0.15
trm12	0.39	99	0.02
SPAC4G8.15c	0.91	0.99	0.05
mug114	0.76	0.85	0.1
SPAC4F10.19c	0.34	0.94	0.65
nup37	0.45	1.09	0.22
SPAC4F10.17	0.63	1.11	0.25
mpd2	0.63	1.11	0.81
mug126	0.64	2.18	0.49
dsc4	0.71	1.03	0.84
mug64	0.92	0.7	0.04
SPAC56F8.02	0.91	0.85	0
SPAC56E4.07	0.9	0.66	0.03
SPAC521.03	0.88	0.9	0.09
SPAC513.07	0.88	1.02	0
SPAC513.04	0.85	0.87	0.03
SPAC4H3.12c	0.49	1	0.56
srs2	0.55	1.22	0.23
SPAC4H3.03c	0.67	1.19	0.87
swc3	0.66	1.01	0.51
SPAC4H3.01	0.66	1.04	0.39
rpl901	99	1	0.91
adh4	0	0	0
SPAC5H10.01	0	0	0
pxa1	0.89	0.84	0.08
mug86	0.88	0.85	0.31
mug143	99	0.91	0.18
SPAC57A7.07c	0.6	0.94	1.06
SPAC57A10.08c	0.75	1.04	0.54
mug10	0.55	1.08	0.34
SPAC56F8.15	0.25	1.12	0.12
SPAC688.04c	0	0	0
SPAC688.03c	0.72	0.97	3.61
SPAC25B8.19c	99	1.01	0
SPAC664.13	0.62	0.92	4.14
SPAC644.13c	0	0	0
SPAC644.08	0.85	99	1.23
SPAC637.13c	0.92	1.15	0
SPAC630.06c	0	0	0
SPAC5H10.10	0.66	1.02	1.24
SPAC5H10.09c	0	0	0
SPAC5H10.07	0	0	0
SPAC6F12.06	0	0	0
fsv1	0	0	0
mug68	0.77	0.84	1.62
SPAC6C3.03c	0	0	0
SPAC6C3.02c	0.7	0.81	0.77
msa1	0.83	0.78	0.94
meu26	0.6	1.09	0.51
tom70	0	0	0
trm10	0	0	0
mrc1	0.67	0.95	1.16
SPAC694.04c	0	0	0
SPAC688.12c	0.25	0	1.53
SPAC750.06c	0.92	0.99	1.06
SPBPB2B2.17c	1.05	0.85	3.53
SPAC750.01	0.91	0.83	1.02
SPAC732.02c	0.9	0.59	1.1
spo7	0.82	99	0.79
mug183	0.78	0	1.06
SPAC6G9.01c	1.17	1.1	0.92
SPAC6G10.06	0.96	0.94	1
SPAC6G10.03c	1.03	0.93	1.08
SPAC6F6.13c	1.01	0.93	0.98
SPAC6F6.11c	0.97	0.88	1.02
pof5	0.68	0.92	0.86
SPAC8E11.06	1.09	99	0
alp31	0.84	0.82	1.52
SPAC26A3.17c	0.36	0.79	0.55
SPAC8C9.10c	0	0	0
mug129	0.82	0.88	0.57
tlg2	0	0.62	0.12
eng1	0.96	1.11	1.24
taf1	0.97	0.98	0.99
SPAC7D4.05	0.63	0.92	1.09
SPAC7D4.08	0.4	1.01	0.87
SPAC7D4.13c	1.06	0.93	1.36
SPAC750.08c	0.53	99	1.05
SPAC977.05c	0.97	0.94	1.83
SPBC1348.03	0	0	0
dph4	0	0	0
SPAC926.02	0.58	0.85	0.22
SPAC922.05c	0.92	0.92	1.04
SPAC922.04	0.82	0.76	0.9
SPAC9.11	0.94	1.18	1.05
SPAC9.02c	0	0	0
pvg1	0.3	0.93	0.86
mug130	0.3	0	1.95
dph3	0	99	0.53
SPAC8E11.01c	0.51	0.97	0.79
SPAC9G1.08c	99	0.93	0
SPAC9G1.07	0.82	0.94	2.02
oxa101	0.91	0.83	1.1
vps24	0	0	0
plr1	0.9	0.89	1.05
SPAC9E9.09c	0	0	0
SPAC9E9.05	0.95	1.12	1.63
leu2	0.91	0.86	0.96
SPAC9E9.17c	0.77	1.02	0.66
dak2	0.69	1.01	0.7
SPAC977.14c	0.4	1.09	0.19
SPAC977.11	0.04	1.02	1.34
SPAPJ691.02	0.83	0.97	0.77
sec74	0.75	0.86	0.72
SPAP8A3.13c	0.94	0.88	0.15
ofd2	0.45	0.94	0.65
prm1	0.64	0.86	0.37
slx1	0.83	0.86	0.88
SPAP27G11.14c	0	0	0
SPAP27G11.12	1.11	0.96	0.78
SPAP27G11.11c	0.96	1.03	0.84
SPAP27G11.02	0	0	0
SPAP14E8.02	0	0	0
vps1	0.82	99	1.08
cbp1	0	0	0
lys4	0.46	0.97	0.82
plg7	0.58	0.9	0.72
SPBC106.03	0.73	0.85	0.69
mug67	0.85	99	1.13
mid2	0.67	1.1	1.12
rif1	0	0	0
SPAPJ695.01c	0.86	0.96	1.09
SPAPJ691.03	0	0	0
SPBC1271.03c	0.25	0.86	0.6
mug96	99	99	0.72
SPBC1271.14	0.19	0.89	0
SPBC1198.08	0.54	0.8	0.76
SPBC1198.01	0.56	0.68	0.73
SPBC119.16c	0.14	1.04	1.08
pmk1	99	99	0.72
SPBC119.03	0.29	1.08	0.97
SPBC115.03	0.4	0.97	1.01
SPBC1105.13c	0.87	1.11	0.7
ubc15	0.93	1.11	1.08
amo1	0.72	0.87	1.15
did2	0.67	0.92	1.84
SPBC13E7.08c	0.59	0.97	0.84
msd1	0.49	0.87	1.02
SPBC13E7.03c	0	0	0
SPBC1347.13c	0.26	0.76	0.8
sro1	0.48	1.24	0.76
trx2	0.77	0.91	0.98
cdm1	0.66	0.96	1.04
SPBC12C2.01c	0.73	1.07	1.55
SPBC1289.14	0.48	0.99	0.63
tim21	0.72	0.95	1.02
SPBC1683.11c	0.83	0.84	0.86
frp1	0.5	0.74	1.27
mal1	0.66	0.8	0.89
SPBC1683.04	0.92	0.85	0.9
SPBC1604.12	0.64	0.82	1.53
SPBC1604.16c	0.81	0.8	0.7
tea2	0.44	1.28	1.09
mug98	0.66	1.03	0.94
meu17	0.74	1.04	1.02
mug97	0.32	0.93	0.95
mug57	0.71	1.09	0.96
SPBC146.02	0.79	1.07	1.03
SPBC16H5.12c	99	99	0.91
ptf2	0.11	0.95	1.18
bag101	0.21	0.74	0.9
SPBC16G5.06	0.29	0.85	0.85
pab2	0.28	0.83	1.15
SPBC16E9.02c	0.8	0.79	0.82
rps1801	0.08	0.89	0.79
SPBC16C6.04	0.7	0.95	1.05
ppr7	0.73	0.91	1.2
SPBC16A3.10	0.86	1.02	1.05
frp1	0.76	1.08	1.03
mal1	0.79	1.14	0.96
SPBC1773.04	0.72	0.85	0.97
chs2	0.62	0.84	1.13
ker1	99	99	1.05
SPBC1711.09c	0.73	0.75	0.92
rpl401	0.64	0.79	0.51
SPBC1711.05	0.42	0.79	1.11
SPBC1709.16c	0.53	1.02	1.01
set10	0.38	1.26	1.02
dus2	0.62	1.05	0.89
wtf2	0.92	1	1.08
SPBC1703.03c	0.73	1.13	1.1
rip1	99	99	1.1
iki1	0.33	0.78	0.8
SPBC18A7.02c	99	99	0.71
mug131	0.63	0.71	1.34
abp2	99	99	1.05
SPBC17D11.08	0.48	0.81	1.46
SPBC17D11.03c	0.61	0.71	1.42
SPBC17D1.05	0.5	1.04	0.69
SPBC17D1.02	0.29	1.14	0.89
SPBC17A3.08	0.68	1.02	1.39
mug184	0.71	1.02	0.96
omh4	0.5	1.16	1.07
SPBC1773.06c	0.81	1.18	0.99
SPBC1A4.04	0.72	0.73	0.84
omh1	0.76	0.91	0.42
SPBC19C7.05	0.67	0.9	1.16
ctu2	0.33	0.77	1.02
mug124	0.71	0.81	1.18
pvg3	0.63	0.73	1.04
ape2	0.45	1.03	0.99
SPBC18E5.13	99	99	0.96
SPBC18E5.10	0.38	0.92	1.01
SPBC18E5.09c	0.18	1.19	1
SPBC18E5.08	0.49	1.05	1.03
SPBC18E5.07	0.86	1.14	1.12
SPBC21B10.07	0.68	0.81	0.84
SPBC21B10.08c	0.65	0.66	0.48
SPBC215.13	0.77	0.68	0.79
SPBC215.11c	0.55	0.79	0.94
csn1	0.66	0.71	0.54
gfh1	0.6	0.75	1.07
SPBC20F10.07	0.62	0.86	0.87
nrl1	0.71	0.93	0.76
SPBC20F10.02c	0.84	1.07	0.93
SPBC23G7.14	0.49	0.84	1.38
rpt6	0.44	0.83	2.18
cms1	0.68	0.89	1.63
SPBC23E6.10c	0.74	0.9	2.48
cmc1	0.54	0.84	2.69
SPBC21D10.08c	0.53	0.89	0.91
sgf29	0.46	0.86	1.81
SPBC21C3.17c	99	99	2.14
SPBC21C3.19	0.79	0.92	1.79
dep1	0	0	0
inp2	0.43	0.89	1.79
SPBC27.05	0.57	0.84	2.07
SPBC25H2.03	0.75	0.92	0.87
SPBC25H2.09	0.68	0.95	1.76
SPBC25H2.10c	0.77	0.89	2.68
mug16	0.85	0.85	2.42
SPBC25B2.10	0	0	0
SPBC25B2.08	99	99	2.2
btb2	0.65	0.82	2.67
dip1	0.63	0.8	1.59
bhd1	0.58	0.79	2.53
SPBC24C6.04	0.68	0.73	2.29
mph1	0.81	0.83	1.25
SPBC29B5.04c	0.59	0.86	1.6
rps902	0.59	0.87	1.18
atp14	99	99	3.3
his7	0.79	0.94	0
SPBC29A10.16c	0.76	0.85	1.46
vps902	0.7	0.94	2.1
ely5	0.7	0.83	2.15
SPBC28F2.05c	0.62	0.83	2.52
mep33	99	99	2.64
sua1	0	0	0
SPBC27B12.11c	0	0	0
mgr2	0.43	0.72	2.07
SPBC2G2.14	0.48	0.85	2.09
crs1	0.5	0.89	1.98
ade9	0.58	0.94	2.34
mug178	0.68	0.92	2.5
syj1	0	1.22	2.6
ubc1	0.81	1.33	2.48
SPBC2D10.09	0.8	0.86	2.41
exg3	0.78	0.89	2.27
SPBC2D10.03c	0.53	0.92	2.58
SPBC2A9.11c	0.63	0.86	2.35
tvp23	0.65	0.88	2.1
SPBC2A9.02	0	0.78	2.11
mug37	0	0.69	1.65
SPBC31F10.03	0.52	1.03	1.97
SPBC31F10.02	0.63	1.09	1.56
atg2	0	0.89	2.11
mbx2	0.4	0.94	2.03
swi3	0.63	0.87	0.68
SPBC30D10.05c	0.69	0.71	2.34
SPBC30D10.09c	0.63	0.75	2.61
pha2	0.58	0.77	2.41
SPBC2G5.04c	0.59	0.73	2.46
ctu1	0.45	0.87	2.21
SPBC2G5.01	0.74	0.91	2.22
SPBC36B7.05c	0.55	0.87	2.24
SPBC36B7.02	0.58	0.93	1.52
SPBC365.07c	0.68	0.81	1.93
spo9	0.67	0.88	1.24
def1	0.77	1	1.28
SPBC354.04	0.44	0.83	1.43
alg6	0.55	0.69	4.99
SPBC337.11	0	0.58	2.68
SPBC336.05c	0	0.5	2.43
mni1	0.59	0.72	2.29
gpx1	0	0.82	2.18
mde2	0	0.82	2.02
SPBC418.02	0.58	0.87	2.06
his4	0.63	0.93	1.76
uch2	0.67	0.94	1.67
SPBC405.06	0.71	0.96	1.95
SPBC405.05	0.19	1.02	1.99
ypt7	0.96	3.3	2.09
elp6	0.46	0.74	0.64
mug176	0.52	0.75	2.35
SPBC3E7.07c	0	0.83	2.79
SPBC3B8.05	0	0.69	1.29
SPBC3B8.08	0.42	0.79	2.23
SPBC11C11.11c	0.78	0.89	2.32
leu3	99	99	2.11
syp1	99	99	1.78
mug136	0.82	1.12	1.82
SPBC4C3.09	0.86	1.06	1.83
liz1	0.82	1.08	0.44
SPBC4B4.12c	0.72	1.25	2.07
SPBC428.10	0.78	1.33	1.66
arg12	5.74	8.45	0.63
apq12	99	99	1.65
exo70	0.87	0.9	1.67
spa1	0.88	0.91	1.27
SPBC577.11	0.97	0.88	1.42
alg5	0.96	0.97	0.08
pnc1	0.98	0.93	1.07
SPBC557.05	1.03	0.91	1.14
SPBC543.08	1.07	0.97	1.16
mod5	1.06	1	1.3
SPBC18A7.01	0.79	1.03	1.07
SPBC4F6.11c	1.14	1.05	0.95
vps901	1	0.96	0.87
plh1	1.03	0.93	0.9
sec2302	0.96	1.01	0.44
arg6	0.87	1.31	0.13
pex5	0.74	0.95	1.21
ofd1	0.91	0.9	1.15
SPBC6B1.03c	0.91	0.93	0.98
aps2	0	99	1.29
exo5	99	99	1.17
fbp1	0	0	0
nse5	0	0	0
mug166	1.07	1.03	1.23
klp6	0.48	1.05	0.7
SPBC8E4.03	0.97	0.82	1.34
SPBC8E4.05c	0.88	0.92	0.31
cao2	99	99	1.13
SPBC8D2.12c	1.06	1.13	0.92
hhf2	99	99	0
pus2	99	99	0.81
SPBC839.03c	0.95	0.96	0.55
SPBC839.02	1.08	0.89	0.31
fic1	0.96	0.96	0.98
sum2	1.02	1.07	1.14
tsf1	1.11	1.06	1.81
whi5	0.9	1.01	0.7
car1	0.99	0.89	0.98
sdh4	0.51	0.77	1.16
ell1	0.54	1.02	1.03
ssr4	0.81	1.24	1.14
naa38	0.95	1.05	0.9
SPBC947.04	0.95	1.01	0.99
frp2	0.46	0.91	0.44
SPBC947.15c	0.82	0.91	1.14
mto2	0.34	0.94	1.03
idh2	1.05	1.04	1.37
SPBC902.03	0.85	1.06	0.5
SPBC8E4.02c	99	99	1.26
set6	0.57	0.84	1.05
mug45	0.63	1.23	1.08
SPBP8B7.02	0.36	0.77	1.23
SPBP4H10.18c	0.99	1.32	1.16
SPBP4H10.17c	0.92	1.21	1.05
SPBP4H10.12	0.32	2.38	0.52
rsv1	0	0	0
SPBP4G3.03	0.76	0.94	1.18
pho1	99	99	1.1
SPBP35G2.12	0.94	1	1.25
ilv1	0.87	1.27	1.3
SPBP35G2.04c	0.91	2.6	1.02
elp4	99	99	0
ppr6	0	0	0
pmp31	0.93	0.97	1.09
SPCC1020.05	99	99	1.41
SPCC1020.08	0.89	1.52	1.09
ecm6	0	0	0
dps1	0	0	0
SPBP8B7.31	0.84	0.95	0.76
stc1	0	0	0
SPBP8B7.26	0.87	1.06	1.14
SPBP8B7.10c	0.67	0.29	1.04
SPBP8B7.08c	0	99	1.32
SPCC126.04c	0.95	0.97	0.65
SPCC126.01c	0.85	1	1.17
meu27	1.06	0.95	1.01
SPCC1259.08	1.02	1.01	1
dga1	0.58	0.94	0.49
mug146	0.95	1.32	0.98
SPCC1235.11	0.71	0.88	6.97
hif2	0.97	0.94	0.27
SPCC1235.03	0.94	1.08	1.26
cbf12	0.77	1.06	0.88
set11	0.73	0.71	0.97
gut2	0.74	0.7	1.03
SPAC17A2.11	1.11	1.08	0.87
vps66	99	99	0.83
SPCC1672.04c	99	99	0.88
SPCC1620.08	1.04	1.03	1.05
mug163	0.78	1.04	1
wtf23	99	99	1.21
SPCC126.13c	0.9	0.9	1.16
iah1	0.8	0.78	0.98
SPCC126.09	0.95	1.1	1.09
rex2	0.21	1.04	0.74
spf38	0.51	1.1	0.45
adn2	0	0	0
SPBC1271.07c	0.67	1.1	0.63
SPBC1198.03c	0.82	0.97	0.88
rti1	0.62	1.31	0.9
SPAC14C4.15c	0.49	1.23	1.05
vps17	0	1.27	0.02
SPAC23A1.19c	0	1.09	1.03
pof8	0.1	0.97	1.08
SPAC17A5.05c	0.02	1.04	0.91
SPBC2A9.07c	0.44	1.04	0.9
SPBC19C7.08c	0.52	1.3	1.22
sre1	0.38	1.28	0.66
SPBC1921.04c	0.24	1.34	0.54
SPBC18H10.20c	0.48	1.3	0.97
ppr2	0	0	0
SPBC1711.11	0.47	1.32	0.98
cid11	0.4	1.28	0.3
SPBC1685.04	0.12	1.12	1.03
SPBC1604.03c	0	1.22	0.71
nop16	0.56	1.05	0.9
spt8	0	1.01	0.3
SPCC132.01c	0	1.11	0.44
wtf11	0.54	1.31	0.53
SPCC1281.07c	0.61	1.47	1.03
SPBC947.09	0.97	1.55	1.06
SPBC8D2.16c	1	1.49	0.27
SPBC685.03	1.23	1.51	1
ntp1	0.65	1.37	1.04
SPBC660.06	0.72	1.3	0.98
reb1	0.65	1.27	1.2
SPBC651.04	0.66	1.51	1.12
SPBC646.08c	0.21	1.28	0.98
sbh1	0	0	0
SPCC1442.05c	0.5	1.28	0.97
SPCC1442.04c	0.42	1.4	0.69
SPCC1442.02	0.53	1.54	1.1
SPCC13B11.03c	0.86	1.38	1.01
SPCC13B11.02c	1.31	1.73	1.05
SPCC1393.13	99	99	0
SPCC1393.09c	0.69	1.32	0.57
spt2	0	1.24	0.79
mug150	0.66	1.2	0.94
kap113	0.63	1.5	0.91
SPCC1322.02	0.56	1.63	0.94
SPCC132.03	0.31	1.34	0.99
coq3	0.2	1.04	2.2
SPCC162.06c	0.85	1.33	0.82
SPCC1020.13c	0.89	1.53	0.68
adn3	0	1.25	0.86
SPCC1494.09c	1.2	1.38	0.82
SPCC1494.08c	1.03	1.69	0.86
arz1	0.57	1.33	0.9
ste6	0.15	1.26	0.79
cek1	0.59	1.31	0.89
SPCC1450.03	0	0	0
SPCC1442.13c	0.71	1.28	0.78
SPCC1442.11c	0.52	1.35	1.02
SPCC1827.04	0.65	1.19	1.04
hnt3	0.83	1.45	0.9
SPCC1795.10c	0.39	1.4	0.83
tco89	0.77	1.39	1.74
git3	0	0	0
mug33	1.24	1.56	0.16
SPCC1739.08c	0.71	1.34	0.85
coq10	0.73	1.32	1.05
SPCC1682.11c	0.33	1.26	1.22
SPCC1672.09	0.66	1.25	0.79
asp1	0	0	0
SPCC162.03	0.51	1.3	0.99
spp27	0	0	0
SPCC18B5.10c	0.73	1.34	0.76
SPCC24B10.16c	0.95	1.47	1.1
gst1	0.93	1.62	0.79
SPCC18B5.10c	0.21	1.45	0.76
SPCC18B5.09c	1.39	2.08	0.78
SPCC18B5.02c	0.66	1.28	0.87
SPCC1884.01	0.25	1.28	0.81
SPCC188.10c	0.68	1.27	0.76
SPCC188.09c	0.55	1.33	0.65
SPCC11E10.09c	0.63	1.69	0.73
pca1	0.5	1.24	0.81
meu8	0.5	1.09	0.92
SPCC550.08	0.74	1.39	0.91
SPCC417.12	0.83	1.42	1.38
dad5	0	0	0
cif1	1.09	1.52	1.04
mug112	0.58	1.27	1.11
SPCC320.14	0.7	1.49	0.83
SPCC330.06c	0.65	1.34	0.77
mug73	0.31	1.33	0.83
SPCC2H8.05c	0.5	0.82	0.3
epe1	0.78	0.87	0.35
SPCC622.15c	99	99	0.51
meu23	0.67	0.84	0.38
SPCC61.03	0.81	0.91	0.51
SPCC5E4.10c	0.82	1.11	0.42
bqt3	0.67	1.02	0.36
SPCC584.03c	0.52	1.02	0.52
cuf2	99	99	0.69
SPCC569.04	99	99	0.6
SPCC553.01c	99	99	0.38
SPBPB10D8.02c	99	99	0.42
SPBP22H7.06	0.88	0.77	0.58
SPBP22H7.04	0.09	0.63	0.45
mim1	0	0	0
SPBC713.05	0.73	0.92	0.44
apl3	0.68	0.97	0.31
pfa5	0.56	0.96	0.62
SPAPB1A11.03	0.55	0.91	0.93
SPACUNK4.10	0.72	0.91	0.38
SPCC757.02c	0.84	0.83	0.37
SPCC736.09c	0.71	0.83	0.74
SPCC663.14c	0.45	0.7	0.53
SPCP20C8.02c	0.6	0.59	0.39
SPBPJ4664.05	0.78	0.36	0.35
SPBPB7E8.01	0.85	0.73	0.37
SPBCPT2R1.01c	0.87	0.85	0.39
SPBPB2B2.18	0.77	0.88	0.45
SPBPB2B2.13	99	99	0.48
SPBPB2B2.07c	0.72	0.88	0.68
SPBPB2B2.03c	0.29	0.93	0.49
SPBC359.01	99	99	0.48
SPBPB10D8.05c	0	0	0
SPBPB10D8.06c	0.64	0.91	0.15
SPBPB10D8.04c	99	99	0.87
rpn10	0.83	0.73	0.49
SPAC57A10.07	0.52	0.61	0.4
SPBPB2B2.14c	0	0	0
mug151	0.63	0.82	0.44
SPAC23H3.11c	0.66	0.86	0.46
mug103	0.56	0.77	0.53
SPAC1F5.03c	0	0	0
SPAC1B3.08	0.32	0.76	0.77
SPAC18G6.05c	0.84	0.88	0.31
meu1-1	0.96	0.84	0.73
SPCC1183.11	0.48	0.85	0.88
SPCPB1C11.02	0.29	0.86	0.49
arg7	0.96	0.79	0.5
spf31	0.96	0.72	0.53
aim27	0	0	0
pof13	0.55	0.73	0.54
SPBC106.08c	0.42	0.87	0.52
SPAC9E9.15	0.83	0.91	0.66
SPAC9E9.04	0.65	0.9	0.36
SPAC6G9.16c	0.52	0.76	0.81
SPAC6G10.10c	0.61	0.95	0.94
SPAC6F6.04c	0.45	0.61	0.72
SPAC664.03	0	0	0
SPAC644.07	99	99	1.05
SPCC550.07	0.9	0.8	0.27
SPCC417.11c	99	99	0.58
SPCC364.04c	0.83	0.72	0.42
vps3	0.77	0.81	0.45
xlf1	0.92	0.87	0.55
SPCC1919.12c	99	99	0.53
sgo1	0.93	0.95	0.78
SPBC18H10.21c	0.49	0.94	0.76
SPBC8E4.04	0.87	0.9	0.79
SPBC2D10.11c	0.9	0.92	0.71
SPBC28E12.04	0.67	0.81	1.16
hob1	0.88	0.92	0.67
SPAC18B11.03c	0.5	0.7	0.73
dlc1	0.75	0.51	0.46
SPAC17H9.06c	99	99	0.61
mst2	0.81	0.79	0.55
med20	0.88	0.86	0
stm1	0.96	0.87	0.47
SPAC17C9.14	0.26	0.82	0.47
ftp2	0.38	0.77	0.68
ulp2	99	99	0.68
SPAC17A2.10c	0.95	0.92	0.71
vps8	0.9	0.81	0.22
SPAC12B10.13	1.09	0.91	0.61
SPBC12C2.09c	0.64	0.74	0.58
SPAC8C9.04	0.63	0.67	0.73
SPAC869.06c	0.87	0.85	0.64
SPAC823.09c	0.61	0.77	0.28
SPAC806.04c	99	99	0.88
idp1	0.48	0.87	0.56
SPAC694.03	0.3	0.8	0.64
pkp1	0.9	0.85	0.65
mug115	0.37	0.83	0.59
meu18	0.3	0.58	0.86
ade7	0.88	0.84	1
SPBC4.06	0.88	0.79	0.95
pof9	0.82	0.68	0.98
erf2	99	99	1.27
SPBC3B8.03	0.58	0.65	1.41
dsd1	0.52	0.87	1.16
nem1	0.81	0.86	1.17
SPBC359.04c	0.64	0.97	1.2
sec28	99	99	0.91
nta1	0.42	0.98	0.96
SPBC21C3.14c	0.52	0.86	1.03
SPCC1620.07c	99	99	0.42
mug55	99	99	0.96
SPCC1450.16c	0.8	0.74	0.94
gdh2	0.52	0.76	1.08
sec65	99	99	0
SPBC660.17c	0.14	0.64	1.14
agn2	0.61	0.86	1.12
SPBC428.11	0.36	0.88	1.19
meu6	0.67	0.86	1.03
rxt2	0	0	0
SPBC409.15	0	0	0
SPCC24B10.02c	0.87	0.8	0.78
wtf25	99	99	1.04
SPCC191.06	0.88	0.8	1.1
bgs4	0.89	0.78	0.98
SPCC18.13	99	99	0.99
SPCC18.10	0.82	0.72	1.05
SPCC16C4.10	0.53	0.85	5.31
SPCC16C4.04	0.89	0.88	1.09
sif2	0.6	0.84	1.1
SPCC16A11.15c	0.86	0.9	0.96
SPCC16A11.01	0.85	0.92	0.93
mug122	99	99	1.05
aah3	0	0	0
SPCC622.06c	0.79	0.88	1.08
SPCC622.03c	0.79	0.72	1.11
SPCC622.02	0.7	0.79	1.04
SPCC594.02c	0.35	0.72	1.15
dph5	0	0	0
sdh3	99	99	1.13
SPCC330.03c	99	99	1.16
SPCC306.11	99	99	1.1
wtf8	99	99	1.02
SPCC24B10.20	99	99	0.79
cgi121	0	0	0
cid12	0	0	0
saf1	99	99	0.53
SPCC663.10	99	99	0.74
SPCC663.09c	99	99	0.86
SPCC663.08c	0.82	0.78	1.14
SPCC663.07c	0.81	0.82	1.16
SPCC663.06c	0.81	0.81	1.14
wtf15	0.85	0.81	1.06
SPCC645.12c	0.82	0.86	1.02
mug117	0.85	0.83	0.95
SPCC63.14	0.75	0.9	0.95
SPCC63.06	0.62	0.94	1.05
SPCC737.07c	0.91	0.92	1.04
SPCC736.13	0.9	0.89	0.61
wtf7	0.74	0.78	1.13
SPCC736.02	99	99	1.02
SPCC70.10	0.83	0.83	1.13
mug9	0.61	0.77	1.13
SPCC70.08c	0.9	0.85	1.09
SPCC70.04c	0.74	0.76	0.99
SPCC70.03c	0.92	0.86	0.93
SPCC70.02c	0.29	0.83	0.89
SPCC663.15c	0.2	0.91	0.95
naa50	0.87	1.1	1.02
for3	0	0	0
cnb1	99	99	0.96
psy1	0	0	0
ef1a-a	0.24	0.85	1.03
lat1	0.86	0.82	1.03
wtf5	0.8	0.8	0.98
wtf20	0.89	0.84	1.07
SPCC794.01c	99	99	0.98
pep3	0	0	0
SPCC777.06c	99	99	0.89
SPCC757.11c	0.88	0.93	0.91
mak3	0.86	1.08	0.92
SPACUNK4.15	0.87	1.01	1.03
SPACUNK4.16c	99	99	1.11
eft202	0.81	0.93	1.02
mug190	0.9	0.92	0.99
tdp1	0.91	0.93	1.02
SPCP31B10.04	0.94	0.87	1.1
SPCP31B10.02	99	99	1.05
are2	99	99	0.97
mug170	99	99	0.85
ypt71	0.6	1.16	1.41
SPAPB1A10.08	11.36	0.72	1.42
SPAPB1A10.05	0.19	0	2
mug82	0.91	1.06	1.26
atg18	0.86	1.07	1.13
SPAC589.03c	0.37	1.05	1.14
med13	0	0.07	0.75
SPAC20H4.08	0.62	0.53	0.81
fml2	0.77	1.32	0.69
SPAC1399.04c	0.65	0.26	0.86
SPAC1399.05c	0.94	0.52	0.85
SPACUNK4.09	0.9	0.15	0.8
SPAPB24D3.07c	0.61	0.74	1.17
SPAPB24D3.05c	0	99	1.29
SPAPB24D3.03	0.3	4.44	0.7
SPAPB24D3.02c	0.2	1.97	1.34
SPAPB21F2.02	0.44	1.21	1.03
SPAPB1E7.08c	0.57	0.55	1.18
eme1	0	99	0.41
gde1	1.02	99	0.95
SPAPB1E7.04c	0.64	0	1.9
SPAPB1A11.02	1.56	0	0.8
SPAPB1A10.13	0.83	0	0.79
SPCPB16A4.06c	1.36	1.39	1.43
SPAC977.02	0.56	99	2.18
SPBPB2B2.09c	0	0	0.88
SPBPB10D8.01	0.59	1.12	1.19
toc1	0.38	99	0.84
SPBC713.07c	0.61	99	0.61
SPBC11B10.08	0.78	0	0.85
SPAPB8E5.08	0.3	0.77	0.61
rpl302	0.3	2.71	0.96
SPAPB8E5.04c	0.41	99	0.79
SPAPB2C8.01	0.55	1.07	0.81
SPAPB24D3.08c	0.24	2.62	0.74
spt20	0	0	0
SPAC4C5.03	0	1.64	1.13
SPAC4A8.14	0.98	1.42	1.38
SPAC4A8.10	1.46	2.28	1.25
SPAC3H1.08c	0.14	0.68	1.13
SPAC23H3.12c	0.69	0.9	0.96
SPAC227.15	1.36	0.93	0.9
SPAC18G6.13	0.87	0.99	0.96
mug99	0.75	1.04	0.91
SPAC144.01	0.91	2.11	1.02
asl1	0.54	1.87	0.83
SPAC12B10.10	0.51	1.29	0.77
SPAP8A3.03	0.42	82.68	1.78
SPAC22E12.01	2.84	1.8	0.82
SPAC824.09c	1.94	0	0.38
SPAC6C3.05	0.7	0.85	1.16
SPAC630.07c	0.6	1.37	1.01
SPAC5H10.04	0.59	1.17	0.9
SPAC5D6.04	0	0.87	0.8
ura3	1.11	2.14	0.89
mug15	0.76	3.96	0.7
SPAC56F8.12	0.6	99	1.27
SPAC4G9.19	0.06	1.02	0.85
gos1	0.73	1.06	0.86
cys11	0	0	0
SPBC31F10.17c	1.07	1.83	0.75
SPBC2D10.19c	0.29	1.55	1.35
SPBC2A9.13	0.6	3.23	1.59
trm1	0.82	0	1.61
SPBC23G7.10c	0.57	0.73	0.91
SPBC21H7.06c	0.67	1.86	0.93
SPBC1773.01	0.52	21.53	1.03
ubp9	0.67	0.99	0.9
lsd90	0.57	2.67	0.98
SPBC16A3.02c	0.9	1.2	0.85
ppr8	0.77	1.92	0.75
SPBC651.12c	0.78	1	0.97
apm3	0.99	1.13	1.12
cwf11	1.17	0.62	1.99
SPBC530.06c	1.21	0.96	1.11
dni2	0.56	99	1.35
SPBC3H7.05c	99	99	0.64
SPBC3H7.11	0.45	99	1.05
rav2	0.74	99	0.99
pdi2	0.76	1.6	0.98
ptp4	0.65	1.24	1.01
but2	0.83	2.94	0.79
ish1	0.79	0.85	0.94
atg20	0.32	1.13	0.99
SPCC16A11.03c	1.06	1.14	1.65
get4	0.63	1.4	1.31
SPCC1450.09c	0.38	1.04	1.15
wtf16	0.99	0.7	1.17
mug4	0.96	1.08	0.92
SPBC887.16	0.62	1.39	0.82
rpl4302	0.84	1.44	0.82
tcg1	1.1	1.35	0.94
SPCC4B3.11c	0.89	1.31	1.06
mto1	0.32	1.79	1.45
SPCC364.07	0.72	1.31	1.45
btb1	0.58	1.46	1.27
mug111	0.93	1.22	1.56
SPCC306.07c	0.68	1.42	1.28
cgs2	0.54	1.42	1
SPCC23B6.02c	0.7	1.18	1.38
SPCC1739.06c	0.33	1.33	1.63
SPCC1739.04c	0.82	1.42	1.36
mug123	0.63	1.55	1.15
rpn1302	0.93	1.39	1.5
SPCC550.09	0.75	1.24	1.08
SPCC550.03c	1.26	1.4	1.26
coq5	0	0	0
mug154	0.83	1.24	0.73
SPCC4G3.17	0.43	1.11	1.28
alp16	0.18	1.18	1.35
SPCC4B3.02c	0.91	1.02	1.38
SPCC4B3.03c	0.42	1.08	1.18
SPCC4B3.06c	0.32	1.03	1.02
nro1	0.91	1.14	0.96
lsg1	0.03	1.16	0.79
SPAPB8E5.10	0.8	1.18	0.88
SPAPB2B4.06	0.18	1.26	0.58
pdr1	0.85	1.13	1.19
SPAPB24D3.06c	0.31	1.11	0.71
puf6	0.35	1.08	0.92
naa40	0.62	1.13	0.98
SPCC757.12	1.01	0.96	1.48
raf1	0.23	0.91	1.38
SPCC5E4.05c	0.24	0.95	1.15
SPCC584.15c	0.53	1.02	1.06
SPCC584.11c	0	0	0
SPCC576.02	0.63	1.08	1.45
atg22	0.22	1.12	0.92
amt2	0.52	1.08	1.14
aat1	0.59	1.01	0.92
los1	0.58	1	0.83
SPCPJ732.02c	0.87	1.03	1.14
SPCPB16A4.05c	0.97	1.06	1.29
trm8	0.39	1.01	1.02
SPCPB16A4.02c	1	1.06	1.24
SPCP20C8.03	0	1.06	1.14
SPCP20C8.01c	0.6	1.09	1.28
SPBPB2B2.19c	0.48	1.09	1.21
SPBC713.09	0.55	1.14	1.19
pex1	0.86	1.1	1.11
trt1	0	0	0
SPBC13A2.04c	0.84	1.03	1.1
SPAC1039.04	0	0	0
get3	0.9	0.97	0.75
SPAC1399.02	99	1.03	0
SPAC14C4.07	0.83	1.03	1.05
SPAC1B3.15c	0.74	1.11	0.88
vht1	0.41	1.04	0.62
str3	0.7	1.04	1.64
SPAC24H6.13	0.88	1.12	1.46
amt3	0.37	1.09	1.3
pcm2	0.84	1.13	0.88
SPAC323.03c	0	1.17	0.56
trm112	0	0	0
dad2	0	1.08	0.87
SPAC17C9.12	0.38	1.1	1.13
sif3	0.55	0.99	1.56
SPAC1399.01c	0.09	1.06	1.29
dbp2	0	1.19	1.33
rpl1102	0.88	1.13	1.19
SPCC1393.08	0.07	1.28	1.1
spf1	0.29	99	0.11
ubr11	1.02	1.25	0.56
SPCC4B3.13	0.94	1.14	0.97
SPCC613.01	0.77	1.11	1.03
meu22	0.83	1.17	1.06
SPCC965.11c	1.09	1.13	0.71
ght1	0.81	1.17	1.2
erd1	0.52	0.66	0.07
SPAC521.04c	0.8	1.3	1.31
cch1	0.6	1.27	0.29
SPCC965.06	0.43	1.15	1.32
abc2	0.4	1.16	1.31
SPBC660.05	0.68	1.15	1.31
ask1	0	0	0
nap1	0.97	1.25	1.06
SPAC3A12.09c	0.81	1.15	1.04
SPAC56E4.03	0.8	1.23	1.06
SPAC869.04	1.25	1.1	1.08
car2	0.89	1.02	1.3
SPBC651.02	0.83	1.19	1.32
abc4	0.58	1.32	1.37
SPAC11D3.18c	0.85	1.28	1.25
SPAC19B12.06c	0.98	1.27	1.42
SPBC582.10c	0.9	1.01	1.84
rec12	0.9	1.01	1.81
rec14	0.95	0.94	5.54
rec6	1.03	0.89	1.83
hht3	1.04	0.89	2.02
pht1	0	0	0
SPAC16.01	0.78	1.32	0
SPAC1687.14c	0.89	1.34	2.38
SPAC17A5.01	0.86	1.35	2.18
csh3	0.86	1.36	2.08
hip1	0.76	1.2	2.35
SPBC359.06	0.67	1.12	0.33
ryh1	0	0	0
SPCC645.13	0.73	0.89	1.93
SPCC757.04	0.69	0.9	1.34
tim13	0	0	0
spc2	0	0	0
SPAC22A12.14c	0.98	0.89	1.95
ubx2	0.69	1.14	2.11
ubp2	0.83	1.4	1.6
SPAC3A11.10c	0.79	1.18	2.37
SPAC521.02	0.75	1.14	2.14
ubp6	0.68	0.94	2.45
SPAC7D4.12c	0.64	1.05	1.46
SPAC17G6.05c	0.83	1.04	0.94
gef2	0.16	0	3.49
tsc2	0.56	1.03	2.22
SPBC1778.09	0.75	0.99	3.59
SPBC215.01	0.28	0.8	1.18
gyp10	0.84	1.25	1.48
SPCC1620.12c	0.77	1.13	1.89
SPACUNK4.13c	0.83	1.22	1.97
SPAC13D6.02c	0.84	1.21	1.43
SPAC222.14c	0.71	1.07	1.99
SPAC9.07c	0.68	1.07	2.35
iki3	0.62	1.02	2.1
rga6	0.57	0.93	1.04
SPBC337.03	0.62	0.86	2.19
adn1	0.66	0.96	4.32
SPBC28F2.11	0.73	0.94	2.23
SPBC115.02c	0.71	0.84	2.78
SPBC146.04	0.79	1.21	1.53
rav1	0.51	1.09	1.4
srx1	0.72	1.24	1.89
nxt1	0.72	1.18	1.88
SPAP32A8.03c	0.76	1.19	2.1
SPAC977.15	0.61	1	2.03
mug27	0.86	1.09	2.2
ppk38	0	0	0
sir2	0.84	1.05	2.23
swi6	0.57	0.82	1.59
sxa2	0.75	0.89	2.59
tht1	0.73	0.78	2.63
nse6	0	0	0
SPAC12G12.01c	0.73	1.26	1.51
SPAC3G9.05	0.74	1.17	1.69
xap5	0.79	1.23	1.73
SPBC725.10	0.82	1.16	0
get1	0.74	1.17	1.95
hri2	0.86	0.97	1.82
ppk9	0.8	0.91	2.61
ppk11	0.78	0.95	2.27
ppk15	0.68	0.87	2.9
mug92	0.76	0.91	10.5
ppk6	0.7	0.84	2.57
ppk21	0.79	1.52	0.89
SPBC29A3.09c	0.77	1.26	2.05
ppk27	0.79	1.24	1.28
ppk30	0.74	1.18	1.43
oca2	0.85	1.29	3.08
srk1	0.71	1.1	2.04
cmk1	0.82	0.96	1.76
cmk2	0.76	1.06	2.28
fus1	0.83	0.94	1.83
isp4	0.69	0.82	2.18
mam4	0.76	0.94	2.26
map2	0.72	0.77	1.96
mfm1	0.9	1.26	1.63
mfm3	0.81	1.21	1.58
pog1	0.82	1.3	1.5
scd3	0.78	1.27	1.99
gsk3	0.76	1.26	2.11
ire1	0.26	1.05	0
thi5	0.8	0.86	2.01
set5	0.66	0.8	1.74
SPCC320.03	0.64	0.81	1.38
SPCC417.09c	0.58	0.82	2.12
SPCC548.05c	0.69	0.75	1.42
SPAC4F10.16c	0.68	1.24	1.38
SPAC6C3.06c	0.58	1.18	1.89
ctr4	0	0	0
SPAC3F10.16c	0	0	0
rfp2	0.83	0.89	1.84
set13	0.88	1	1.5
SPAC6B12.07c	0	0	0
ace2	0.39	0.93	0.86
SPBC16G5.03	0.78	1.01	1.41
SPBC1773.16c	0	1.15	0.46
pas4	0.36	0.77	0.69
SPBC215.06c	0	0.75	0.86
SPBC216.04c	0	0.75	0.84
SPBC530.08	99	99	0.84
SPBC9B6.03	99	99	1.04
SPBP8B7.23	0	0.54	0.27
fep1	0	1	1.21
sub1	0.49	0.93	1.19
cph1	99	99	0.48
SPAC19B12.07c	0.59	1.05	1.31
not3	0.76	1.11	0.44
set3	0	1.15	0.46
sxa1	0	0.66	1
SPAC25B8.11	0	0.77	0.95
zip1	0	0.76	0.88
akr1	0	0.79	1.04
msc1	0	0.79	1
byr1	0.8	1.06	0.84
cds1	0.87	0.99	1.08
rad2	0	1.05	0.8
rad24	99	99	1.16
rad25	0.67	1.12	0.98
obr1	0	1.05	0.44
ste20	99	99	0
cox6	99	99	0
cox8	0	0.69	1.13
aif1	0	0.66	0.43
SPAC17H9.08	0	0	0
SPAC227.03c	99	0	0.69
rem1	0	1.03	0.75
SPBC19G7.10c	0	99	0.38
vps71	1	0.97	1.4
mrm2	0	1.02	0.4
SPBC2G2.17c	0.87	1.08	0.84
SPBC31F10.12	0.62	1.14	0.32
pof6	0.26	0.76	0.7
sum1	0	0.85	0.73
tpr1	0	0.79	0.29
atg12	0	0.71	0.08
ral2	99	99	0.23
pho4	0	0.79	0.26
SPBP35G2.14	1.18	0.94	1.27
SPCC1183.07	0.59	0.94	0.71
mug24	99	99	1.19
rnc1	1.24	1.1	1.29
SPCC61.05	0.94	1.12	0.48
snf59	0.58	1.09	1.24
mex67	0.21	0.73	1.09
SPAC26H5.02c	0	0.73	1.04
pku80	0	0.94	0.77
top1	0	0.85	0.96
crn1	99	99	0.98
ivn1	0	0.83	0.07
SPBC21B10.03c	0.95	0.98	0.99
rrp8	0.51	1.01	1.35
gar2	1.15	1.04	0.91
sla1	0.91	0.97	1.07
puf3	0.63	0.98	1.05
nop12	1.2	1.09	0.8
mug28	99	99	1.16
cip1	0	0.83	0.86
sab14	0	0.84	0.81
ctf1	99	99	0.7
SPBC428.12c	99	99	0.97
SPBC56F2.08c	0	0.75	0.99
ade1	0.27	0.97	0.9
SPAC2F3.11	0.69	0.97	0.87
SPAC227.14	0.4	1	0.53
SPCC830.10	1.04	1.05	0.52
pab1	99	99	0.35
ggt2	0.48	1.05	0.35
SPAC328.09	0.26	0.7	0.45
cyp8	0	0.68	0.14
SPAC27F1.06c	0	0.72	0.45
SPAC2F3.02	99	99	0.34
pac10	99	99	0.15
cyp4	0	0.65	0.27
gyp2	0	0.98	0.56
SPCC1450.07c	1.09	1.07	0.89
SPCC338.06c	1.01	1.05	0.49
gpt1	0.81	1.11	0.09
SPBC25B2.01	0.58	1.2	0.39
SPCC553.08c	99	99	0.14
rpl1602	99	99	0
rpl1603	99	99	0.68
rpl1702	0	0	0
vph2	0.03	0.92	0.11
vps25	0.61	0.34	0
arg4	0.85	0.61	0.18
SPBC887.17	1	0.8	0.19
SPBP8B7.18c	0	0	0
SPAC1805.16c	0.95	0.84	0.1
arg11	0.9	0.66	0.62
arg3	0.82	1.06	0.92
pub3	0.94	0.99	0.72
SPBC947.01	0.55	0.77	0.13
hos2	1	0.62	0
ssr3	0.62	0.95	0.25
SPAC24C9.12c	0.56	0.25	0
snu23	1.2	0.88	0.35
adg2	1.11	0.91	0.52
SPAC19A8.11c	0.72	99	0.01
tma23	1.03	0.75	0.09
SPAC17A2.14	1.15	0.82	0.5
SPAC1327.01c	0.9	0.83	0.63
qcr8	0.87	0.99	0.37
mug65	0.81	0.71	0.77
srp1	0.61	0.99	0.47
atp5	0.51	0.28	0.25
SPAC3A11.04	0.3	0.47	0.52
SPAC343.06c	1.17	0.86	0.69
phx1	0.98	0.82	0.29
SPAC32A11.02c	1	0.85	0.51
tps1	0	0	0
SPAC328.01c	0.35	0.78	0.28
SPAC323.05c	1.03	0.84	0.78
sde2	0.64	0.9	0.53
SPAC31G5.21	0.7	0.96	0.56
erv14	0.57	0.75	0.24
SPAC2C4.10c	0.6	0.87	0.46
mug66	1.06	0.15	0.23
SPAC630.10	0.42	0.67	0
vps29	0	0	0
SPAC4H3.04c	1.16	0.96	0.61
SPAC4D7.06c	0.62	0.84	0.48
dil1	0.82	0.84	0.28
mms1	0	0	0
SPAC3H8.02	0	0	0
SPAC3H5.11	0.94	0.88	0.7
rpl2301	0.37	0.89	0.44
hrp3	0.69	0.77	0.71
mug191	0.85	0.74	0.51
atg6	0.58	0.91	0.64
mug63	0	0	0
SPAC8C9.06c	0	0	0
bqt1	0.9	0.86	0.73
rpl24	0.9	0.98	0.6
mug185	0.98	0.8	0.57
SPAC6B12.06c	1.23	0.72	0.64
ies2	0.82	0.83	0.32
mus7	0.46	0.72	3
SPAC6F12.04	0.93	0.92	0.68
cit1	0.93	0.92	0.72
SPAC644.09	0.94	0.9	0.59
SPAC637.09	0.53	0.18	0.08
SPBC11C11.06c	0.11	0.68	0.18
exg1	0.91	0.79	0.45
syn1	0.98	0.88	0.67
SPAP8A3.07c	0.81	0.84	0.68
hsp9	0.79	0.81	0.36
SPAC977.12	0.71	0.54	0.13
SPAC926.06c	1	0.85	0.64
SPAC922.07c	0.79	0.86	0.69
SPAC9.08c	0.8	0.88	0.75
nnt1	1.04	0.9	0.7
SPAC8E11.04c	0.86	0.89	0.17
SPAC8E11.10	0.37	0.41	0.16
SPBC16H5.13	0.24	0.38	3.45
SPBC16G5.02c	0.84	0.71	0.48
mug100	0.85	0.91	0.73
SPBC16C6.03c	0.87	0.85	0.62
SPBC16C6.01c	0	0	0
SPBC1685.14c	0.94	0.86	0.49
cti6	0.89	0.86	0.69
pcl1	0.84	0.85	0.75
SPBC13E7.07	0.75	0.9	0.57
SPBC1347.09	0.65	0.88	0.3
SPBC12C2.04	0.21	0.74	0.14
SPBC12C2.07c	0.62	0.87	0.01
SPBC18H10.19	0.47	0.35	0.02
SPBC18H10.18c	0.71	0.63	0
edc3	0.33	0.53	0
nep1	0.63	0.69	0
SPBC11C11.01	0.4	0.47	0
SPBC17A3.02	0.76	0.77	0.09
rap1	0.85	0.51	0.09
SPBC1711.04	0.5	0.67	0.1
SPBC1703.09	0.55	0.51	0.26
SPBC23G7.06c	0	0	0
SPBC23E6.01c	0.13	0.87	0.25
glo1	1.03	0.92	0.57
SPBC21C3.06	0.87	0.95	0.81
SPBC215.10	1.02	0.92	0.73
SPBC20F10.03	1.02	0.85	0.59
mug80	0.03	0.63	0.59
blt1	0.53	1.02	0.73
ulp1	0.06	0.88	0.86
mbx1	0.6	0.67	0.43
bqt4	0.74	1.08	0.91
pmt1	0.93	1.09	1.02
atp15	0	0	0
pdb1	99	99	0.35
hmt2	0.5	0.95	0.81
mug110	0.11	0.3	0.54
apl1	0.96	0.86	0.38
SPBC2F12.05c	0	0	0
myo51	1.01	0.89	0.27
SPBC2D10.04	0.29	0.76	0.16
sec22	0	0	0
SPBC25H2.15	0	0	0
mug164	0.99	0.97	0.48
bag102	0.56	1.33	0.12
wpl1	0	0	0
SPBC405.03c	0.8	0.6	0
SPBC3E7.11c	0	0	0
mug20	0.33	0.87	0.14
SPBC365.14c	0	0	0
SPBC365.11	0	0	0
SPBC354.07c	0.13	0.76	0.16
SPBC342.04	0	0	0
gas4	0	0	0
SPBC337.02c	0.87	0.95	0
SPBC32F12.12c	0.63	0.44	0.33
swc2	0.1	0.48	0.62
SPBC9B6.11c	0	0	0
apl2	0	0	0
SPBC83.16c	0.66	0.7	0.3
SPBC776.16	0.47	0.84	0.55
hob3	0	0.27	0.88
gtp1	0.26	0.18	0
rhp14	0.75	0.72	0.11
mug71	0.33	0.6	0.23
txl1	0.94	0.75	0.78
rpl3801	0.62	0.3	0
mug147	0.19	0.6	0.14
dot2	0	0	0
pof4	0.44	0.32	0.39
SPBC12C2.03c	0	0	0
SPBC106.13	0.64	1.31	1.12
cwf16	0.76	0.86	0.84
erg31	0.45	0.38	0.25
SPCC1281.04	0.27	0.64	0.39
bio2	0.63	0.77	0.6
eaf1	0.51	1.14	0.44
ung1	0.35	0.46	0.22
erd2	0	1.09	0.88
SPBP8B7.13	0	0	0
ccq1	0	0	0
SPCC1840.09	0	0	0
SPCC1840.05c	0.6	0.93	0.58
SPCC1827.03c	0.84	0.54	0.96
SPCC18.17c	1.83	0.84	1.4
wtf21	0.99	0.41	0
SPCC162.02c	0.28	0.49	0.75
wtf13	0.61	0.26	0.51
zta1	0.51	0.35	1
ers1	0.25	0.9	0
SPCC1322.03	0	0.4	0
mug166	0.93	0.65	0.55
SPCC622.07	0.57	0.93	0.92
SPCC622.04	0.23	0.58	0.29
SPCC622.01c	0.62	1.01	1.82
SPCC613.03	0.35	0.93	0.69
SPCC594.06c	0.66	0.94	0.55
SPCC417.04	2.02	1.43	0
SPCC306.02c	0.16	1.83	0
rpt4	0.81	0.85	0.83
SPCC285.04	0.56	0.46	0.07
SPCC1919.13c	0	0	0
SPCC1919.07	0	0	0
ski3	0.9	0.6	0.6
SPCPB1C11.03	0.73	0.97	1.03
SPBPB10D8.07c	1.35	0.41	0
SPBPB10D8.03	0.93	0.94	1.11
SPBC691.05c	0.68	0.85	0.93
git5	0.16	0.5	0.35
nep2	0.32	1.14	0.25
SPBC32H8.01c	0.39	1.42	0.1
SPAP32A8.02	0.79	1.23	0.47
SPCC63.03	0	0	0
bis1	1.05	0.86	0.71
SPCC338.18	1.03	1.05	0.66
SPCC191.10	0.71	1.31	0.38
SPBC30D10.03c	1.04	1.03	0.47
SPBC1778.05c	0.44	1.03	0.13
SPBC106.17c	0.46	0.84	0.3
spo3	1.25	1.18	0.72
apc14	1.05	0.94	0.82
SPAC22E12.18	0.85	0.9	0.47
SPAC1687.08	0.48	0.83	0.59
mad3	0.96	0.89	0.85
SPCC576.01c	0.81	0.8	0.87
SPCC1450.12	0.67	1.09	0.25
psh3	0	1.59	0.21
SPBC409.17c	0.62	1.62	0.09
SPBC409.16c	1.08	2.33	0.28
SPBC365.16	0.59	0.19	0.03
atf21	0.88	1.73	0.31
SPBC27B12.06	0.64	0.76	0.08
vsp20	0	1.66	0.3
saf4	0.77	0.78	0.11
SPAC824.05	0.42	0.36	0.65
SPAC5H10.05c	0.94	0.89	0.92
tfs1	1.21	1.7	0.68
SPACUNK4.17	1.43	2.69	0.5
pal1	0.04	0.19	0
vps35	0	0	0
SPCC736.07c	0.29	0.94	0.02
gdh1	0	0.28	0
SPCC553.05c	1.02	1.1	0.38
ctp1	0	0.23	0.28
SPCC23B6.04c	99	99	0.38
pef1	0.35	0.81	0.56
SPCC16C4.20c	0	0	0
SPCC1620.13	0.42	0.59	0.25
ppb1	0	0	0
erf4	0.46	0.67	0.24
rgf3	0.86	1.06	0.06
atm1	0.94	1.02	0.76
SPCC737.06c	0.9	1.03	0.38
jmj4	0.6	0.85	0.25
rsp1	1.59	1.66	0.34
SPAPB2B4.07	0.95	0.84	0.86
SPAPB21F2.03	0.7	0.66	0.34
arv1	0.49	0.82	0.52
SPAPB1A10.14	0.81	2.41	0
SPAC589.04	0	1.18	0.05
SPAC139.01c	0.8	0.94	0.38
SPBC13G1.04c	1.07	1.3	0.22
pus1	0	0	0
ada1	1.22	1.45	0.31
aps1	0.11	0	0
exo1	0.56	0.91	0.15
met16	0	0	0
SPAC17G6.03	0.52	1.18	0.13
SPAC1B3.01c	1.07	0.97	0
SPAC22G7.07c	0.24	0.58	0
SPAC25B8.05	99	99	2.04
eca39	0.82	0.73	0.9
uds1	0.88	0.94	0
rtt109	1.08	1.35	0.43
atg5	0.81	0.78	0
rpl1002	0.37	1.57	0
rpl1601	0.78	1.25	0.1
rpl1502	0.32	0.84	0
rpl3001	0.68	0.63	0.07
rpl3002	0.77	1.03	0.14
bdc1	0	0	0
SPBC3E7.12c	0.87	0.83	0.8
myh1	0.71	0.64	0.31
rhp23	0	0	0.31
rdh54	0.39	0.91	0.02
hrk1	1.32	2.06	0.8
SPAC23C4.06c	0.8	0.95	0.43
cfh1	0.73	1.13	0.43
cao1	0.76	0.94	0.64
SPAC4G9.14	0.72	0.92	0.68
SPAC57A7.12	0.97	0.85	0.43
SPAC9G1.05	1	0.86	0.92
rsv2	0.52	0.83	0.27
rlp1	0.93	0.83	0.62
mlh1	0.55	0.4	0.04
rhp18	0.54	0.93	0.07
apn1	1.11	1.05	0.71
cmb1	0.96	1	0.67
hsp16	1.23	2.71	0
msh6	0.98	1.35	0
rhp26	0.84	0.75	0.18
rad55	0.54	0.63	0.25
rad57	0.95	0.73	0.33
mms19	0.69	0.74	0.41
ddb1	0.73	0.65	0.4
ypa2	0	1.35	0.24
ptf1	0	0	0
gda1	0	0	0
SPAC9G1.10c	0	1.05	0.56
SPBC1778.03c	99	5.16	0
SPBC17A3.06	0	1.11	0
SPBC26H8.05c	0	1.77	0
SPBC3F6.01c	0	0	0
ser2	0	1.25	0
syj2	0	0	0
ynd1	1.03	1.51	1.1
stp1	0	1.07	0.14
SPAC12G12.07c	0	0	0
mug134	0	0	0
slt1	0	0	0
pdh1	99	2.02	0
cid2	99	1.07	0.11
azr1	0	0	0
rpa12	0	0	0
rpb9	99	0.97	0.57
ssu72	0	0.56	0.74
rox3	0.62	1.69	0.09
pho2	0.76	1.1	1.03
pli1	99	0.71	0.16
bub3	0	0	0
tea3	0	0	0
rga9	0	0	0
gmf1	99	0.67	0
dma1	0	0	0
mid1	0	0.97	0.29
moe1	0	0	0
rec8	99	1.05	0
SPAC694.02	0	0.61	0
SPCC24B10.03	99	1.31	0.27
fap2	0	0	0
SPCP1E11.10	0	0.48	0.19
lon1	0	0.38	0.15
par1	0	0.83	0
cdt2	0	0	0
spn2	0	0	0
spn5	0	1	0.07
arp9	0	0.16	0.06
acp2	0.38	0.98	0.64
arp1	0	0.81	0.14
SPCC794.11c	99	1.83	0.54
cyk3	0	0.93	0.34
SPBC17D1.07c	0.39	0.97	0.74
SPAC29B12.11c	0	1.21	0
SPAC27E2.02	99	1.13	0
SPAC27D7.02c	99	1.08	0
pnn1	99	0.74	0.04
fft3	99	1.04	0
sib2	0	0.79	0.08
SPAC22F8.04	0	0.96	0
SPAC20H4.05c	99	0.8	0.76
SPAC1F8.04c	0	1.1	0.37
ncs1	0	0.46	0.41
SPAC1705.02	0	0.7	0.13
SPBC19F8.03c	0	0	0
SPAC3H5.08c	0	1.3	0
SPAC13G6.08	99	0.82	0.14
SPAC513.02	99	0.36	0
SPAC4H3.07c	99	0.92	0.25
rnh201	99	1.06	0
stg1	0	0	0
SPAC4C5.01	0	0	0
SPAC4A8.06c	0	0.79	0
img2	0	0.88	3.26
pcs2	0.71	0.94	0.88
SPAC2F3.16	0	1.18	0.49
SPAC2C4.17c	0	0.85	0.44
lys1	99	0.97	0
mcs2	0	0.78	0.14
tpp2	0	0.75	0
SPBC16G5.07c	0	0	0
SPBC16G5.09	99	0.73	0
SPBC1711.12	99	0.59	0.81
arf6	0	0	0
est1	0	0.85	0.1
SPBC2F12.03c	0	0	0
eri1	0	0	0
SPBC2D10.07c	0	0.93	0.78
rsc4	0	0	0
myo1	0	0.4	0.28
pob3	0	0	0
nif1	99	0.9	0.33
SPBC16A3.12c	99	0.89	0
SPAC1952.09c	0	0	0
ect1	0	0	0
plb1	0.14	0.88	0.58
fas1	0.84	1.05	0.58
cho2	0.85	1.03	0.65
nup151	1.25	1.67	0.9
nup61	1.15	1.24	0.9
SPCC18B5.06	1.26	1.16	0.94
SPAC12B10.04	0.91	1.02	0.32
SPAC1D4.02c	1.25	1.27	0.72
SPAC458.02c	1.28	1.18	0.4
spn1	0.65	1.62	0.62
mug1	0.97	1.63	0.82
bun107	0.84	1.64	0.63
atb2	0.87	1.59	0.82
myp2	0.66	1.44	1
dnm1	0.48	1.36	1.01
nic1	1.22	1.7	1.06
bsu1	1.45	1.52	1
yps1	1.24	1.54	0.77
hhp2	1.4	1.64	0.49
cam2	1.11	1.17	0.59
zfs1	0.95	1.64	1.07
SPBC1198.06c	0.73	1.73	0.26
SPBC31F10.10c	0.79	1.48	0.92
ypa1	0.46	1.12	0.98
atg7	0.61	1.25	0.98
maf1	0.55	1.29	1
SPBC1271.09	1.24	1.6	0.92
SPBC1683.03c	1.41	1.37	0.75
abc3	1.3	1.31	0.92
SPBC1683.12	1.2	1.18	0.36
SPBC1652.02	1.12	1.04	0.66
put4	1.31	1.28	0.76
SPBC15C4.04c	0.9	1.74	0.61
SPBC1685.07c	0.75	1.29	0.93
SPCC18.02	0.86	1.78	0.86
SPCC584.13	0.42	1.16	0.33
ght6	0.61	1.22	0.44
SPAC23D3.12	0.51	1.2	0.94
SPAC1071.03c	1.35	1.48	0.92
SPAC1039.08	1.38	1.27	1.02
SPAC1039.06	1.29	1.4	1.01
SPAC1039.03	1.24	1.22	0.94
SPAC1039.02	1.2	1.07	0.85
red1	1.28	0.93	0.84
urg3	0.91	1.9	0.56
SPAC1002.12c	0.95	1.81	0.81
pom34	0.88	1.77	0.93
SPBC16A3.14	0.96	1.78	0.81
set9	0.37	2	0.61
gti1	0.84	1.8	0.96
SPAC11D3.15	1.36	1.58	0.63
SPAC11D3.11c	1.18	1.31	0.87
SPAC11D3.09	1.34	1.31	0.94
SPAC11D3.04c	1.28	1.14	0.85
SPAC11D3.02c	1.27	1.15	0.74
SPAC11D3.01c	1.29	0.87	0.63
SPAC10F6.14c	0.95	2.02	0.99
mug94	0.92	1.69	0.96
ubc6	0.99	1.75	0.95
SPAC1093.03	1.05	1.68	0.97
SPAC1071.11	0.88	1.66	1.11
SPAC1071.05	0.85	1.72	0.8
iwr1	1.32	1.58	0.64
SPAC23H4.16c	1.25	1.23	0.49
SPAC23H3.15c	1.22	1.3	0.57
eng2	1.26	1.23	0.58
SPAC23D3.05c	1.19	1.06	0.56
msh1	1.27	0.97	0.62
[truncated: 817 more rows]

## Sheet: Clustered
	S. pombe Genomic Screen Data (Clustered)
	The number of the genes corresponds to the order of genes in the heat map of the clustered growth fitness profiles of S. pombe genomic deletion mutants in response to BHA, BHT, and BPA.
	Gene Name (Deleted in Mutants)	0.3 mM BHA (GSV)	0.6 mM BHT (GSV)	0.6 mM BPA (GSV)
1	zds1	0.33	3	2.79
2	oca2	0.85	1.29	3
3	SPAC17A2.02c	0.84	1.29	2.95
4	rec14	0.95	0.94	3
5	clr3	0.84	1.02	3
6	SPBPB2B2.17c	1.05	0.85	3
7	pmp3	0.9	0.79	3
8	SPBC1778.09	0.75	0.99	3
9	SPAC688.03c	0.72	0.97	3
10	mug92	0.76	0.91	3
11	SPCC1235.11	0.71	0.88	3
12	adn1	0.66	0.96	3
13	SPAC664.13	0.62	0.92	3
14	mac1	0.66	0.85	3
15	ppk15	0.68	0.87	2.9
16	SPBC115.02c	0.71	0.84	2.78
17	ubp11	0.44	0.97	2.89
18	SPCC16C4.10	0.53	0.85	3
19	alg6	0.55	0.69	3
20	mus7	0.46	0.72	3
21	ubc1	0.81	1.33	2.48
22	SPAC1687.14c	0.89	1.34	2.38
23	SPAC3A11.10c	0.79	1.18	2.37
24	hip1	0.76	1.2	2.35
25	SPAC9.07c	0.68	1.07	2.35
26	SPBC25H2.10c	0.77	0.89	2.68
27	rad9	0.85	0.93	2.6
28	ppk9	0.8	0.91	2.61
29	sxa2	0.75	0.89	2.59
30	SPAC13D6.03c	0.78	0.95	2.54
31	tht1	0.73	0.78	2.63
32	ppk6	0.7	0.84	2.57
33	btb2	0.65	0.82	2.67
34	SPBC30D10.09c	0.63	0.75	2.61
35	cmc1	0.54	0.84	2.69
36	SPBC2D10.03c	0.53	0.92	2.58
37	SPBC28F2.05c	0.62	0.83	2.52
38	bhd1	0.58	0.79	2.53
39	mug16	0.85	0.85	2.42
40	SPBC2D10.09	0.8	0.86	2.41
41	sks2	0.76	0.85	2.43
42	SPBC23E6.10c	0.74	0.9	2.48
43	mug178	0.68	0.92	2.5
44	ubp6	0.68	0.94	2.45
45	SPBC30D10.05c	0.69	0.71	2.34
46	SPBC2G5.04c	0.59	0.73	2.46
47	pha2	0.58	0.77	2.41
48	mug176	0.52	0.75	2.35
49	img2	0	0.88	3
50	SPBC3E7.07c	0	0.83	2.79
51	syj1	0	1.22	2.6
52	rud3	0.03	0.9	2.45
53	SPAC27D7.11c	0.21	0.58	3
54	SPBC1685.05	0	0.66	3
55	SPBC16H5.13	0.24	0.38	3
56	gef2	0.16	0	3
57	SPBC337.11	0	0.58	2.68
58	SPBC336.05c	0	0.5	2.43
59	ypt7	0.96	3	2.09
60	SPAP8A3.03	0.42	3	1.78
61	SPBC2A9.13	0.6	3	1.59
62	SPAC17A5.01	0.86	1.35	2.18
63	csh3	0.86	1.36	2.08
64	gsk3	0.76	1.26	2.11
65	SPBC29A3.09c	0.77	1.26	2.05
66	SPBC4B4.12c	0.72	1.25	2.07
67	SPACUNK4.13c	0.83	1.22	1.97
68	scd3	0.78	1.27	1.99
69	mug27	0.86	1.09	2.2
70	sir2	0.84	1.05	2.23
71	SPAC521.02	0.75	1.14	2.14
72	SPAP32A8.03c	0.76	1.19	2.1
73	ubx2	0.69	1.14	2.11
74	srk1	0.71	1.1	2.04
75	SPAC222.14c	0.71	1.07	1.99
76	SPAC3A11.02	1.19	1.07	2.13
77	hht3	1.04	0.89	2.02
78	his5	0.91	1.01	2.04
79	ubp14	0.93	0.91	2.07
80	SPAC22A12.14c	0.98	0.89	1.95
81	elp3	0.87	1.02	2.07
82	his1	0.87	0.94	2.09
83	SPAC9G1.07	0.82	0.94	2.02
84	cmk2	0.76	1.06	2.28
85	SPBC11C11.11c	0.78	0.89	2.32
86	ppk11	0.78	0.95	2.27
87	mam4	0.76	0.94	2.26
88	SPBC28F2.11	0.73	0.94	2.23
89	exg3	0.78	0.89	2.27
90	SPBC2G5.01	0.74	0.91	2.22
91	nth1	0.65	1.05	2.3
92	tsc2	0.56	1.03	2.22
93	ade9	0.58	0.94	2.34
94	SPBC2A9.11c	0.63	0.86	2.35
95	SPBC337.03	0.62	0.86	2.19
96	SPBC36B7.05c	0.55	0.87	2.24
97	vps902	0.7	0.94	2.1
98	iki3	0.62	1.02	2.1
99	SPAC977.15	0.61	1	2.03
100	ely5	0.7	0.83	2.15
101	nup211	0.72	0.89	2.08
102	thi5	0.8	0.86	2.01
103	tvp23	0.65	0.88	2.1
104	SPBC418.02	0.58	0.87	2.06
105	swd2	0.6	0.84	2.05
106	SPCC417.09c	0.58	0.82	2.12
107	SPAC24B11.08c	0.6	0.79	2.04
108	SPCC16A11.03c	1.06	1.14	1.65
109	tco89	0.77	1.39	1.74
110	SPBC428.10	0.78	1.33	1.66
111	cat1	0.85	1.1	1.84
112	mug136	0.82	1.12	1.82
113	SPBC4C3.09	0.86	1.06	1.83
114	srx1	0.72	1.24	1.89
115	get1	0.74	1.17	1.95
116	SPCC1620.12c	0.77	1.13	1.89
117	nxt1	0.72	1.18	1.88
118	xap5	0.79	1.23	1.73
119	SPAC3G9.05	0.74	1.17	1.69
120	SPAC6C3.06c	0.58	1.18	1.89
121	tsf1	1.11	1.06	1.81
122	rec6	1.03	0.89	1.83
123	SPAC977.05c	0.97	0.94	1.83
124	SPBC582.10c	0.9	1.01	1.84
125	rec12	0.9	1.01	1.81
126	hri2	0.86	0.97	1.82
127	cmk1	0.82	0.96	1.76
128	fus1	0.83	0.94	1.83
129	rfp2	0.83	0.89	1.84
130	SPBC21C3.19	0.79	0.92	1.79
131	exo70	0.87	0.9	1.67
132	SPBC354.08c	0.86	0.9	1.64
133	SPBC405.06	0.71	0.96	1.95
134	SPCC645.13	0.73	0.89	1.93
135	SPBC56F2.03	0.66	0.98	1.81
136	SPCC622.01c	0.62	1.01	1.82
137	did2	0.67	0.92	1.84
138	SPBC3B8.04c	0.66	0.94	1.79
139	SPBC25H2.09	0.68	0.95	1.76
140	his4	0.63	0.93	1.76
141	str3	0.7	1.04	1.64
142	mug68	0.77	0.84	1.62
143	uch2	0.67	0.94	1.67
144	cms1	0.68	0.89	1.63
145	SPBC336.13c	1.8	0.72	1.98
146	SPAC22A12.17c	1.83	0.28	2.08
147	cwf11	1.17	0.62	1.99
148	nmt1	1.1	0.57	2.03
149	SPBC24C6.04	0.68	0.73	2.29
150	klp3	0.77	0.78	2.21
151	isp4	0.69	0.82	2.18
152	mni1	0.59	0.72	2.29
153	rad17	0.89	0.81	2.03
154	chl1	0.79	0.77	2
155	map2	0.72	0.77	1.96
156	SPBC365.07c	0.68	0.81	1.93
157	rpl1202	0.77	0.68	1.91
158	SPAC1296.01c	0.86	0.7	1.77
159	SPBC23E6.02	0.86	0.75	1.67
160	SPAC1093.02	0.74	0.82	1.75
161	ayr1	0.75	0.76	1.7
162	tit1	0.69	0.75	1.71
163	set5	0.66	0.8	1.74
164	dsc1	0.6	0.68	1.81
165	alm1	0.77	0.52	1.68
166	grx5	0.79	0.22	2.4
167	SPBC354.09c	0.53	0	2.33
168	SPAPB1E7.04c	0.64	0	1.9
169	ctu1	0.45	0.87	2.21
170	rpt6	0.44	0.83	2.18
171	SPBC3B8.08	0.42	0.79	2.23
172	SPBC2F12.04	0.37	0.75	2.28
173	SPAC23H4.09	0.33	0.78	2.25
174	mag1	0.52	1.06	2.02
175	SPBC31F10.03	0.52	1.03	1.97
176	mbx2	0.4	0.94	2.03
177	SPBC27.05	0.57	0.84	2.07
178	SPBC2G2.14	0.48	0.85	2.09
179	crs1	0.5	0.89	1.98
180	spn6	0.37	0.82	1.98
181	mgr2	0.43	0.72	2.07
182	nht1	0.42	0.69	2.01
183	coq3	0.2	1.04	2.2
184	SPAC10F6.15	0.2	0.91	2.26
185	atg17	0.19	0.82	2.2
186	SPAC23H3.14	0.24	0.85	2.11
187	SPBC405.05	0.19	1.02	1.99
188	spo20	0.25	0.78	1.99
189	atg2	0	0.89	2.11
190	gpx1	0	0.82	2.18
191	SPBC2A9.02	0	0.78	2.11
192	mde2	0	0.82	2.02
193	omh6	0.23	1.63	1.85
194	tae1	0.55	0.92	1.86
195	SPAC13G6.15c	0.53	0.85	1.85
196	sgf29	0.46	0.86	1.81
197	inp2	0.43	0.89	1.79
198	ybt1	0.43	0.79	1.69
199	SPBC16A3.06	0.42	0.79	1.69
200	SPAC11D3.14c	0.43	0.78	1.67
201	dlc2	0.45	0.75	1.65
202	SPAC23C4.05c	0.37	0.8	1.7
203	rad8	0.29	0.79	1.92
204	SPBP22H7.05c	0.28	0.74	1.87
205	SPAC1071.09c	0.31	0.78	1.76
206	SPAC30.02c	0.28	0.79	1.76
207	pom152	0.28	0.8	1.72
208	snf30	0.32	0.76	1.68
209	arp8	0.22	0.88	1.62
210	SPCC285.05	0.18	0.83	1.61
211	SPCC16C4.06c	0.47	0.42	2.1
212	mug130	0.3	0	1.95
213	SPAPB1A10.05	0.19	0	2
214	zuo1	0	0	2.02
215	SPAC22E12.01	2.84	1.8	0.82
216	SPAC26F1.11	1.56	2.72	1.02
217	SPBP35G2.04c	0.91	2.6	1.02
218	SPAC4A8.10	1.46	2.28	1.25
219	SPCC18B5.09c	1.39	2.08	0.78
220	hrk1	1.32	2.06	0.8
221	SPAC17G8.09	1.13	2.14	1.15
222	dap1	1.2	2.02	1.05
223	ura3	1.11	2.14	0.89
224	SPAC144.01	0.91	2.11	1.02
225	SPAC10F6.14c	0.95	2.02	0.99
226	pnk1	1.09	1.84	1.73
227	mug162	0.94	1.69	1.27
228	SPCC13B11.02c	1.31	1.73	1.05
229	nic1	1.22	1.7	1.06
230	SPAC26A3.06	1.16	1.81	0.85
231	nup151	1.25	1.67	0.9
232	SPBC1271.09	1.24	1.6	0.92
233	SPCC594.04c	1.04	1.65	1.18
234	zfs1	0.95	1.64	1.07
235	SPAC1071.11	0.88	1.66	1.11
236	ubc6	0.99	1.75	0.95
237	SPAC1093.03	1.05	1.68	0.97
238	SPAC24H6.10c	0.99	1.68	0.91
239	SPAC11G7.01	0.92	1.74	0.95
240	mug94	0.92	1.69	0.96
241	SPAC1002.12c	0.95	1.81	0.81
242	SPBC16A3.14	0.96	1.78	0.81
243	SPAC11E3.14	0.94	1.73	0.83
244	SPCC1494.08c	1.03	1.69	0.86
245	mug1	0.97	1.63	0.82
246	pom34	0.88	1.77	0.93
247	gti1	0.84	1.8	0.96
248	SPCC18.02	0.86	1.78	0.86
249	SPAC1071.05	0.85	1.72	0.8
250	SPAC24B11.09	0.89	1.67	0.92
251	pcf3	0.9	1.63	0.91
252	ubc13	0.84	1.66	0.95
253	mug70	0.74	1.65	0.95
254	pdi2	0.76	1.6	0.98
255	SPCPB16A4.06c	1.36	1.39	1.43
256	SPCC550.03c	1.26	1.4	1.26
257	rpn1302	0.93	1.39	1.5
258	ubp2	0.83	1.4	1.6
259	pog1	0.82	1.3	1.5
260	mfm1	0.9	1.26	1.63
261	SPAC9E9.05	0.95	1.12	1.63
262	mug111	0.93	1.22	1.56
263	SPAC186.09	0.93	1.2	1.49
264	mfm3	0.81	1.21	1.58
265	SPBC146.04	0.79	1.21	1.53
266	gyp10	0.84	1.25	1.48
267	SPAC4A8.14	0.98	1.42	1.38
268	SPCC417.12	0.83	1.42	1.38
269	SPCC1739.04c	0.82	1.42	1.36
270	SPAC19B12.06c	0.98	1.27	1.42
271	SPAC13D6.02c	0.84	1.21	1.43
272	ilv1	0.87	1.27	1.3
273	SPAC11D3.18c	0.85	1.28	1.25
274	SPAC521.04c	0.8	1.3	1.31
275	ppk27	0.79	1.24	1.28
276	SPBC651.02	0.83	1.19	1.32
277	bsu1	1.45	1.52	1
278	SPAC1039.06	1.29	1.4	1.01
279	SPAC1071.03c	1.35	1.48	0.92
280	SPBC685.03	1.23	1.51	1
281	cif1	1.09	1.52	1.04
282	SPAC1039.08	1.38	1.27	1.02
283	SPAC11D3.09	1.34	1.31	0.94
284	abc3	1.3	1.31	0.92
285	meu32	1.22	1.29	0.97
286	SPAC1039.03	1.24	1.22	0.94
287	SPAC11D3.11c	1.18	1.31	0.87
288	tcg1	1.1	1.35	0.94
289	nup61	1.15	1.24	0.9
290	ynd1	1.03	1.51	1.1
291	SPBC947.09	0.97	1.55	1.06
292	SPCC24B10.16c	0.95	1.47	1.1
293	SPCC1020.08	0.89	1.52	1.09
294	SPCC13B11.03c	0.86	1.38	1.01
295	urg2	0.96	1.46	0.93
296	SPAC24H6.08	0.84	1.54	0.93
297	ppk21	0.79	1.52	0.89
298	hnt3	0.83	1.45	0.9
299	SPBC31F10.10c	0.79	1.48	0.92
300	SPBP4H10.18c	0.99	1.32	1.16
301	SPCC4B3.11c	0.89	1.31	1.06
302	grx2	0.88	1.19	1.11
303	nap1	0.97	1.25	1.06
304	SPBP4H10.17c	0.92	1.21	1.05
305	SPAC9.11	0.94	1.18	1.05
306	gpd2	0.97	1.21	1
307	ssr4	0.81	1.24	1.14
308	ght1	0.81	1.17	1.2
309	SPAC56E4.03	0.8	1.23	1.06
310	meu22	0.83	1.17	1.06
311	SPCC550.09	0.75	1.24	1.08
312	btf3	0.73	1.25	1.05
313	mug146	0.95	1.32	0.98
314	SPBC16A3.02c	0.9	1.2	0.85
315	SPBC1773.06c	0.81	1.18	0.99
316	SPBC14F5.13c	0.85	1.25	0.93
317	SPAC8C9.12c	0.83	1.17	0.9
318	SPAC1786.01c	0.76	1.23	0.87
319	SPAPB8E5.10	0.8	1.18	0.88
320	SPBC1773.01	0.52	3	1.03
321	lsd90	0.57	2.67	0.98
322	rpl302	0.3	2.71	0.96
323	SPAPB24D3.02c	0.2	1.97	1.34
324	SPAC607.06c	0.33	2.02	1.04
325	SPAC12G12.01c	0.73	1.26	1.51
326	SPCC364.07	0.72	1.31	1.45
327	abc4	0.58	1.32	1.37
328	SPAC4F10.16c	0.68	1.24	1.38
329	ppk30	0.74	1.18	1.43
330	SPCC23B6.02c	0.7	1.18	1.38
331	SPCC306.07c	0.68	1.42	1.28
332	get4	0.63	1.4	1.31
333	btb1	0.58	1.46	1.27
334	reb1	0.65	1.27	1.2
335	SPBC19C7.08c	0.52	1.3	1.22
336	SPBC21H7.06c	0.67	1.86	0.93
337	mug123	0.63	1.55	1.15
338	SPBC651.04	0.66	1.51	1.12
339	SPCC1281.07c	0.61	1.47	1.03
340	SPCC1442.02	0.53	1.54	1.1
341	SPCC1322.02	0.56	1.63	0.94
342	myp2	0.66	1.44	1
343	SPAC589.12	0.53	1.49	0.97
344	kap113	0.63	1.5	0.91
345	SPCC320.14	0.7	1.49	0.83
346	coq10	0.73	1.32	1.05
347	SPBC660.06	0.72	1.3	0.98
348	SPBC106.13	0.64	1.31	1.12
349	ntp1	0.65	1.37	1.04
350	SPAC630.07c	0.6	1.37	1.01
351	mug45	0.63	1.23	1.08
352	mug112	0.58	1.27	1.11
353	ptp4	0.65	1.24	1.01
354	atg7	0.61	1.25	0.98
355	SPCC1827.04	0.65	1.19	1.04
356	SPCC550.08	0.74	1.39	0.91
357	SPCC1739.08c	0.71	1.34	0.85
358	SPBC1685.07c	0.75	1.29	0.93
359	SPCC18B5.02c	0.66	1.28	0.87
360	rti1	0.62	1.31	0.9
361	arz1	0.57	1.33	0.9
362	cek1	0.59	1.31	0.89
363	mug150	0.66	1.2	0.94
364	SPAC4H3.03c	0.67	1.19	0.87
365	cgs2	0.54	1.42	1
366	SPCC1442.11c	0.52	1.35	1.02
367	dnm1	0.48	1.36	1.01
368	tea2	0.44	1.28	1.09
369	maf1	0.55	1.29	1
370	SPCC162.03	0.51	1.3	0.99
371	SPCC1442.05c	0.5	1.28	0.97
372	SPBC1711.11	0.47	1.32	0.98
373	SPBC18H10.20c	0.48	1.3	0.97
374	SPAC14C4.15c	0.49	1.23	1.05
375	omh4	0.5	1.16	1.07
376	SPAC23D3.12	0.51	1.2	0.94
377	SPAPB21F2.02	0.44	1.21	1.03
378	set10	0.38	1.26	1.02
379	pca1	0.5	1.24	0.81
380	mto1	0.32	1.79	1.45
381	SPCC1739.06c	0.33	1.33	1.63
382	SPBC2D10.19c	0.29	1.55	1.35
383	SPCC1682.11c	0.33	1.26	1.22
384	SPCC132.03	0.31	1.34	0.99
385	SPBC646.08c	0.21	1.28	0.98
386	SPBC18E5.09c	0.18	1.19	1
387	mug73	0.31	1.33	0.83
388	SPCC1884.01	0.25	1.28	0.81
389	SPAC4C5.03	0	1.64	1.13
390	SPCC1393.08	0.07	1.28	1.1
391	swd3	0	1.29	1.15
392	pmp1	0	1.29	1.05
393	abp1	0	1.2	0.95
394	adn3	0	1.25	0.86
395	SPAPB1A10.08	3	0.72	1.42
396	SPBC18H10.07	3	0.85	1.26
397	SPCC18.17c	1.83	0.84	1.4
398	ppk8	1.61	1	1.59
399	SPCC757.12	1.01	0.96	1.48
400	idh2	1.05	1.04	1.37
401	SPAC7D4.13c	1.06	0.93	1.36
402	vps71	1	0.97	1.4
403	rnc1	1.24	1.1	1.29
404	SPBP35G2.14	1.18	0.94	1.27
405	mod5	1.06	1	1.3
406	mug166	1.07	1.03	1.23
407	SPCPB16A4.02c	1	1.06	1.24
408	SPBC543.08	1.07	0.97	1.16
409	SPAC24H6.13	0.88	1.12	1.46
410	set13	0.88	1	1.5
411	SPCC4B3.02c	0.91	1.02	1.38
412	SPBC577.11	0.97	0.88	1.42
413	SPBC2G5.02c	0.93	0.91	1.4
414	SPAC11D3.10	0.9	0.92	1.36
415	eng1	0.96	1.11	1.24
416	SPCPB16A4.05c	0.97	1.06	1.29
417	SPCC1235.03	0.94	1.08	1.26
418	mug82	0.91	1.06	1.26
419	car2	0.89	1.02	1.3
420	SPBP35G2.12	0.94	1	1.25
421	SPAC16A10.01	0.91	1.02	1.22
422	rpl1102	0.88	1.13	1.19
423	pdr1	0.85	1.13	1.19
424	SPBC18E5.07	0.86	1.14	1.12
425	SPCC126.01c	0.85	1	1.17
426	atp16	0.85	1.01	1.15
427	SPBC887.08	0.83	0.98	1.25
428	hem12	0.8	0.99	1.24
429	spa1	0.88	0.91	1.27
430	SPCC1906.02c	0.9	0.88	1.28
431	isp7	0.92	0.92	1.2
432	ofd1	0.91	0.9	1.15
433	SPCC126.13c	0.9	0.9	1.16
434	SPAC323.07c	0.82	0.92	1.2
435	SPBPB2B2.11	0.81	0.94	1.17
436	SPBC947.15c	0.82	0.91	1.14
437	his2	0.82	0.87	1.2
438	SPBC12C2.01c	0.73	1.07	1.55
439	met6	0.77	0.97	1.53
440	SPBC16G5.03	0.78	1.01	1.41
441	SPBC17A3.08	0.68	1.02	1.39
442	SPBC31F10.02	0.63	1.09	1.56
443	sif3	0.55	0.99	1.56
444	SPBC36B7.02	0.58	0.93	1.52
445	ypt71	0.6	1.16	1.41
446	SPCC576.02	0.63	1.08	1.45
447	SPAC7D4.12c	0.64	1.05	1.46
448	rav1	0.51	1.09	1.4
449	rrp8	0.51	1.01	1.35
450	SPBC660.05	0.68	1.15	1.31
451	SPCP20C8.01c	0.6	1.09	1.28
452	SPAC19B12.07c	0.59	1.05	1.31
453	snf59	0.58	1.09	1.24
454	SPBPB10D8.01	0.59	1.12	1.19
455	SPBC713.09	0.55	1.14	1.19
456	def1	0.77	1	1.28
457	trs130	0.73	0.89	1.26
458	SPAC9.06c	0.79	0.95	1.18
459	pex5	0.74	0.95	1.21
460	SPBP4G3.03	0.76	0.94	1.18
461	ppr7	0.73	0.91	1.2
462	SPBC725.04	0.61	0.97	1.33
463	SPAC5H10.10	0.66	1.02	1.24
464	SPBC359.04c	0.64	0.97	1.2
465	mrc1	0.67	0.95	1.16
466	spo9	0.67	0.88	1.24
467	SPBC19C7.05	0.67	0.9	1.16
468	SPAC869.04	1.25	1.1	1.08
469	SPBC530.06c	1.21	0.96	1.11
470	sum2	1.02	1.07	1.14
471	SPCC1620.08	1.04	1.03	1.05
472	SPBC557.05	1.03	0.91	1.14
473	SPAC6G10.03c	1.03	0.93	1.08
474	SPCC18B5.06	1.26	1.16	0.94
475	SPAC6G9.01c	1.17	1.1	0.92
476	SPBC4F6.11c	1.14	1.05	0.95
477	gar2	1.15	1.04	0.91
478	SPBC8D2.12c	1.06	1.13	0.92
479	SPCC1450.07c	1.09	1.07	0.89
480	SPCC1259.08	1.02	1.01	1
481	meu27	1.06	0.95	1.01
482	SPAC6F6.13c	1.01	0.93	0.98
483	car1	0.99	0.89	0.98
484	plh1	1.03	0.93	0.9
485	vps901	1	0.96	0.87
486	apm3	0.99	1.13	1.12
487	SPCC126.09	0.95	1.1	1.09
488	ubc15	0.93	1.11	1.08
489	pmt1	0.93	1.09	1.02
490	pex1	0.86	1.1	1.11
491	atg18	0.86	1.07	1.13
492	SPBP8B7.26	0.87	1.06	1.14
493	naa50	0.87	1.1	1.02
494	SPAC3H5.09c	0.9	1.05	1.09
495	wtf2	0.92	1	1.08
496	SPCPJ732.02c	0.87	1.03	1.14
497	SPCC1840.08c	0.87	1.01	1.1
498	SPBC13A2.04c	0.84	1.03	1.1
499	cds1	0.87	0.99	1.08
500	SPAC750.06c	0.92	0.99	1.06
501	SPBC16A3.10	0.86	1.02	1.05
502	SPACUNK4.15	0.87	1.01	1.03
503	SPAC30D11.11	0.88	0.98	1.06
504	SPAC14C4.07	0.83	1.03	1.05
505	SPAC186.01	0.84	1.01	1.06
506	pnc1	0.98	0.93	1.07
507	pmp31	0.93	0.97	1.09
508	SPBPB10D8.03	0.93	0.94	1.11
509	sla1	0.91	0.97	1.07
510	SPAC922.05c	0.92	0.92	1.04
511	SPCC737.07c	0.91	0.92	1.04
512	tdp1	0.91	0.93	1.02
513	ppk1	0.93	0.88	1.12
514	SPAC1D4.05c	0.95	0.9	1.09
515	SPCP31B10.04	0.94	0.87	1.1
516	rep1	0.95	0.87	1.08
517	plr1	0.9	0.89	1.05
518	SPAPJ695.01c	0.86	0.96	1.09
519	SPBC16A3.08c	0.83	0.9	1.11
520	SPAC19A8.02	0.87	0.92	1.04
521	SPAC15E1.10	0.83	0.9	1.03
522	SPCC645.12c	0.82	0.86	1.02
523	SPCC4B3.13	0.94	1.14	0.97
524	nro1	0.91	1.14	0.96
525	sdh1	0.89	1.07	0.99
526	mug4	0.96	1.08	0.92
527	rok1	0.95	1.08	0.88
528	btb3	0.9	1.1	0.92
529	naa38	0.95	1.05	0.9
530	SPAC15E1.02c	0.93	1.03	0.87
531	mug121	0.91	1.05	0.88
532	SPAC18B11.02c	0.81	1.12	1.01
533	SPAC1783.01	0.83	1.11	0.98
534	SPAC1565.01	0.83	1.11	0.95
535	SPAC13F5.04c	0.83	1.12	0.92
536	mak3	0.86	1.08	0.92
537	SPBC20F10.02c	0.84	1.07	0.93
538	klp8	0.84	1.08	0.91
539	meu31	0.82	1.08	0.94
540	SPAC17G6.05c	0.83	1.04	0.94
541	SPAC1A6.05c	0.81	1.05	0.96
542	arg3	0.82	1.06	0.92
543	mug157	0.86	1.16	0.88
544	pcm2	0.84	1.13	0.88
545	SPBC2G2.17c	0.87	1.08	0.84
546	SPBC947.04	0.95	1.01	0.99
547	taf1	0.97	0.98	0.99
548	SPBC21B10.03c	0.95	0.98	0.99
549	fic1	0.96	0.96	0.98
550	SPAC6G10.06	0.96	0.94	1
551	rpl2001	0.96	0.89	0.94
552	SPAC750.04c	0.89	0.97	0.99
553	SPAC18G6.13	0.87	0.99	0.96
554	SPBC6B1.03c	0.91	0.93	0.98
555	mug190	0.9	0.92	0.99
556	swr1	0.9	0.92	0.95
557	SPCC16A11.15c	0.86	0.9	0.96
558	SPCC16A11.01	0.85	0.92	0.93
559	rad3	0.9	0.98	0.88
560	wdr21	0.89	0.99	0.84
561	SPBC1198.03c	0.82	0.97	0.88
562	SPCC757.11c	0.88	0.93	0.91
563	skb5	0.86	0.93	0.85
564	spo6	0.85	0.91	0.87
565	SPBC1703.03c	0.73	1.13	1.1
566	SPAC3A12.09c	0.81	1.15	1.04
567	SPAC1565.03	0.75	1.15	1.03
568	SPCC613.01	0.77	1.11	1.03
569	pho2	0.76	1.1	1.03
570	SPBC18A7.01	0.79	1.03	1.07
571	SPAC1F12.03c	0.73	1.03	1.07
572	SPBC146.02	0.79	1.07	1.03
573	mug163	0.78	1.04	1
574	frp1	0.76	1.08	1.03
575	meu17	0.74	1.04	1.02
576	mid2	0.67	1.1	1.12
577	SPBC543.02c	0.69	1.06	1.14
578	otu2	0.71	1.03	1.12
579	naa40	0.62	1.13	0.98
580	ats1	0.63	1.08	1
581	SPAC20G8.09c	0.65	1.03	1.04
582	SPBC27B12.05	0.78	0.93	1.14
583	SPAC31G5.04	0.77	0.92	1.13
584	twf1	0.78	0.95	1.07
585	SPAC16E8.13	0.77	0.92	1.1
586	SPCC622.06c	0.79	0.88	1.08
587	SPAC212.02	0.77	1.01	1.03
588	mnh1	0.82	0.96	1.05
589	eft202	0.81	0.93	1.02
590	SPAC18G6.12c	0.75	1	1.01
591	SPAC22F3.09c	0.76	0.97	1.04
592	SPCPB1C11.03	0.73	0.97	1.03
593	abc1	0.7	0.96	1.05
594	SPBC16C6.04	0.7	0.95	1.05
595	mak10	0.74	0.93	1.01
596	tim21	0.72	0.95	1.02
597	ain1	0.73	0.94	0.99
598	SPAC1952.10c	0.67	0.96	1.13
599	SPAC7D4.05	0.63	0.92	1.09
600	cdm1	0.66	0.96	1.04
601	puf3	0.63	0.98	1.05
602	SPAC19D5.02c	0.65	0.98	1.02
603	SPAC17G8.08c	0.65	0.95	1.01
604	cda1	0.63	0.92	1.04
605	SPAC222.13c	0.67	0.89	1
606	SPBPB2B2.05	0.66	0.9	1
607	SPCC63.06	0.62	0.94	1.05
608	SPAC57A7.07c	0.6	0.94	1.06
609	rga6	0.57	0.93	1.04
610	mal1	0.79	1.14	0.96
611	tif224	0.78	1.07	0.9
612	bqt4	0.74	1.08	0.91
613	mug99	0.75	1.04	0.91
614	SPAC1687.07	0.81	1.07	0.88
615	SPAC1B3.15c	0.74	1.11	0.88
616	pep7	0.76	1.08	0.86
617	cbf12	0.77	1.06	0.88
618	gos1	0.73	1.06	0.86
619	mug57	0.71	1.09	0.96
620	rad25	0.67	1.12	0.98
621	SPAC20G8.04c	0.68	1.1	0.9
622	mug184	0.71	1.02	0.96
623	SPAC2F3.07c	0.8	0.98	0.96
624	SPBC651.12c	0.78	1	0.97
625	din1	0.8	0.96	0.96
626	SPAC27F1.03c	0.81	0.98	0.93
627	uga1	0.76	0.98	0.98
628	SPAC13G6.13	0.75	0.95	0.97
629	SPAC823.13c	0.75	0.95	0.94
630	trx2	0.77	0.91	0.98
631	rmt3	0.77	0.88	0.93
632	SPCC63.14	0.75	0.9	0.95
633	SPAC12G12.11c	0.73	0.9	0.92
634	ure2	0.72	0.88	0.93
635	SPAC23H3.12c	0.69	0.9	0.96
636	SPAC323.04	0.75	0.98	0.89
637	meu13	0.77	0.92	0.86
638	SPBC25H2.03	0.75	0.92	0.87
639	dbp3	0.74	0.93	0.87
640	SPAC16E8.12c	0.77	0.94	0.85
641	scn1	0.76	0.92	0.84
642	SPBC15C4.05	0.72	0.97	0.86
643	SPAC2F3.11	0.69	0.97	0.87
644	pcs2	0.71	0.94	0.88
645	SPAC5H10.04	0.59	1.17	0.9
646	tip1	0.59	1.09	0.92
647	rdp1	0.66	1.03	0.98
648	mug98	0.66	1.03	0.94
649	srb10	0.64	1	0.95
650	dus2	0.62	1.05	0.89
651	SPAC29A4.13	0.66	0.98	0.91
652	ubp9	0.67	0.99	0.9
653	SPAC1F3.06c	0.57	0.98	0.97
654	fkh1	0.59	0.99	0.95
655	nop16	0.56	1.05	0.9
656	aat1	0.59	1.01	0.92
657	SPAC1F3.08c	0.62	0.95	0.93
658	SPAC6G10.10c	0.61	0.95	0.94
659	SPCC18.03	0.61	0.92	0.95
660	pof5	0.68	0.92	0.86
661	SPAC30C2.07	0.66	0.91	0.87
662	SPAC27D7.10c	0.65	0.9	0.85
663	SPAC212.01c	0.57	0.91	0.95
664	SPCC622.07	0.57	0.93	0.92
665	SPAPB1A11.03	0.55	0.91	0.93
666	SPAC1F7.10	0.59	0.87	0.97
667	mde6	0.56	0.86	0.95
668	SPBC21D10.08c	0.53	0.89	0.91
669	SPBC13E7.08c	0.59	0.97	0.84
670	SPAC1639.02c	0.54	0.92	0.89
671	alp31	0.84	0.82	1.52
672	gsa1	0.87	0.78	1.51
673	rsm1	0.75	0.83	1.54
674	SPBC29A10.16c	0.76	0.85	1.46
675	SPAC144.05	0.75	0.75	1.51
676	SPBC106.07c	0.8	0.73	1.42
677	SPCC18B5.05c	0.8	0.61	1.48
678	omh5	0.83	0.55	1.45
679	SPBC8E4.03	0.97	0.82	1.34
680	nte1	1.03	0.85	1.23
681	rpl2302	0.78	0.8	1.33
682	pso2	0.82	0.75	1.33
683	sod1	0.79	0.75	1.33
684	SPBC16D10.08c	0.82	0.72	1.25
685	SPAC1F3.05	0.73	0.69	1.31
686	dip1	0.63	0.8	1.59
687	SPBC29B5.04c	0.59	0.86	1.6
688	bgs2	0.6	0.84	1.62
689	gma12	0.58	0.83	1.59
690	swi6	0.57	0.82	1.59
691	SPBC25D12.06	0.48	0.87	1.59
692	SPBC1604.12	0.64	0.82	1.53
693	ubr1	0.63	0.83	1.51
694	SPAC11D3.03c	0.6	0.84	1.46
695	SPAC17A2.12	0.72	0.75	1.46
696	lys2	0.67	0.74	1.5
697	mrt4	0.61	0.76	1.48
698	SPCC757.04	0.69	0.9	1.34
699	SPBP4H10.14c	0.69	0.85	1.37
700	ppr5	0.62	0.88	1.35
701	SPAC20G4.08	0.69	0.78	1.35
702	SPCC320.03	0.64	0.81	1.38
703	SPBC1652.01	0.71	0.8	1.28
704	SPBC1604.19c	0.69	0.78	1.27
705	SPBC1289.13c	0.64	0.82	1.31
706	sec72	0.65	0.85	1.25
707	SPAC26A3.11	0.67	0.75	1.44
708	SPCC548.05c	0.69	0.75	1.42
709	SPBC17D11.03c	0.61	0.71	1.42
710	SPBC17A3.03c	0.54	0.72	1.39
711	SPBC3B8.03	0.58	0.65	1.41
712	mug131	0.63	0.71	1.34
713	SPCC1840.07c	0.65	0.68	1.27
714	par2	0.5	0.7	1.28
715	SPAC1610.02c	1.08	0	1.41
716	rpl2502	1.03	0	1.39
717	trm1	0.82	0	1.61
718	pof11	0.95	0.22	1.41
719	SPAC1F12.02c	0.89	0.12	1.4
720	SPAC3H1.05	0.92	0.82	1.21
721	rid1	0.94	0.79	1.16
722	SPBC3E7.04c	0.93	0.78	1.16
723	ade10	0.9	0.82	1.15
724	SPBC14C8.15	0.93	0.76	1.22
725	bot1	0.91	0.74	1.2
726	mug186	0.9	0.73	1.19
727	SPCC1223.09	0.95	0.86	1.12
728	mam3	0.92	0.87	1.07
729	SPAC589.10c	0.89	0.89	1.12
730	SPCC16C4.04	0.89	0.88	1.09
731	SPCC70.08c	0.9	0.85	1.09
732	oxa101	0.91	0.83	1.1
733	wtf20	0.89	0.84	1.07
734	php2	0.97	0.82	1.11
735	SPCC1682.06	0.95	0.79	1.11
736	SPCC24B10.18	0.94	0.8	1.13
737	mdm31	0.93	0.79	1.14
738	spg1	0.93	0.8	1.12
739	SPBC36.11	0.98	0.81	1.1
740	tco89	0.95	0.8	1.08
741	SPCC24B10.19c	0.95	0.77	1.09
742	SPBC16G5.05c	0.91	0.78	1.11
743	SPCC191.02c	0.91	0.78	1.08
744	SPCC191.06	0.88	0.8	1.1
745	ubp12	0.87	0.78	1.08
746	wtf16	0.99	0.7	1.17
747	thi2	0.87	0.63	1.2
748	SPAC732.02c	0.9	0.59	1.1
749	mph1	0.81	0.83	1.25
750	gas5	0.86	0.84	1.17
751	nem1	0.81	0.86	1.17
752	SPBC19G7.18c	0.83	0.84	1.16
753	mug138	0.83	0.84	1.13
754	SPCC663.07c	0.81	0.82	1.16
755	SPCC70.10	0.83	0.83	1.13
756	SPCC663.06c	0.81	0.81	1.14
757	SPAC27D7.09c	0.77	0.83	1.15
758	SPBC28E12.02	0.76	0.81	1.16
759	tif452	0.86	0.77	1.16
760	imp2	0.85	0.76	1.13
761	SPCC663.08c	0.82	0.78	1.14
762	pqt1	0.79	0.79	1.16
763	rga2	0.77	0.8	1.18
764	qcr6	0.79	0.75	1.19
765	SPAC27E2.07	0.82	0.86	1.11
766	SPBC26H8.13c	0.8	0.86	1.12
767	sec71	0.79	0.83	1.11
768	SPBC1348.02	0.86	0.82	1.1
769	wtf15	0.85	0.81	1.06
770	SPBC1703.11	0.82	0.79	1.11
771	ist1	0.81	0.79	1.08
772	zhf1	0.8	0.77	1.11
773	SPCC622.03c	0.79	0.72	1.11
774	SPAC1F7.06	0.84	0.77	1.06
775	SPBC16C6.05	0.82	0.74	1.07
776	SPBC21C3.09c	0.82	0.75	1.04
777	SPCC18.10	0.82	0.72	1.05
778	SPAC22A12.16	0.79	0.71	1.05
779	sen1	1.17	0.81	1.03
780	SPCC338.14	1.15	0.78	0.96
781	SPAC6F6.11c	0.97	0.88	1.02
782	sst6	1	0.84	0.99
783	rps7	0.94	0.84	1
784	leu2	0.91	0.86	0.96
785	SPAC9G1.05	1	0.86	0.92
786	SPAC5H10.05c	0.94	0.89	0.92
787	SPCC70.03c	0.92	0.86	0.93
788	SPAC2G11.10c	0.94	0.81	0.92
789	cid1	0.96	0.86	0.87
790	SPAPB2B4.07	0.95	0.84	0.86
791	SPAC227.17c	1.14	0.62	1.03
792	SPAC21E11.04	0.97	0.7	0.92
793	SPAC1399.05c	0.94	0.52	0.85
794	shy1	0.9	0.85	1.03
795	SPAC750.01	0.91	0.83	1.02
796	SPCC63.13	0.87	0.86	1.03
797	lat1	0.86	0.82	1.03
798	ade7	0.88	0.84	1
799	SPBC887.02	0.85	0.85	0.97
800	SPAC513.06c	0.86	0.78	1.04
801	vtc4	0.86	0.79	1.02
802	bgs4	0.89	0.78	0.98
803	SPBC8D2.18c	0.81	0.79	1.02
804	ura1	0.81	0.78	1.02
805	SPAC823.10c	0.84	0.78	0.98
806	wtf5	0.8	0.8	0.98
807	iah1	0.8	0.78	0.98
808	SPBC428.14	0.81	0.73	0.99
809	SPBC1683.04	0.92	0.85	0.9
810	SPBC1709.14	0.87	0.87	0.92
811	atp12	0.89	0.87	0.89
812	prw1	0.89	0.81	0.91
813	SPAC2H10.02c	0.87	0.83	0.9
814	mug117	0.85	0.83	0.95
815	ish1	0.79	0.85	0.94
816	slx1	0.83	0.86	0.88
817	SPBC1683.11c	0.83	0.84	0.86
818	SPBC4.06	0.88	0.79	0.95
819	cnt5	0.85	0.75	0.92
820	msa1	0.83	0.78	0.94
821	SPAC1952.17c	0.79	0.8	0.91
822	SPAC2E1P5.02c	0.79	0.79	0.91
823	SPAC29B12.05c	0.8	0.77	0.91
824	SPCC1450.16c	0.8	0.74	0.94
825	SPAC922.04	0.82	0.76	0.9
826	eca39	0.82	0.73	0.9
827	SPCC576.01c	0.81	0.8	0.87
828	ubp7	0.78	0.77	0.86
829	pof9	0.82	0.68	0.98
830	rho3	0.84	0.65	0.93
831	arb2	0.79	0.68	0.95
832	mde10	0.82	0.56	1.02
833	SPCC1827.03c	0.84	0.54	0.96
834	amo1	0.72	0.87	1.15
835	rpl1201	0.75	0.83	1.19
836	rec11	0.74	0.81	1.21
837	SPAC13F5.03c	0.75	0.81	1.17
838	SPAC16C9.01c	0.72	0.81	1.18
839	mug124	0.71	0.81	1.18
840	vps13a	0.73	0.79	1.17
841	wtf7	0.74	0.78	1.13
842	pdp2	0.67	0.78	1.21
843	SPAC6C3.05	0.7	0.85	1.16
844	SPBC28E12.04	0.67	0.81	1.16
845	SPAC167.07c	0.65	0.79	1.16
846	SPAC23A1.14c	0.69	0.82	1.13
847	slc1	0.68	0.79	1.13
848	pex7	0.7	0.73	1.13
849	SPBC19F8.04c	0.69	0.64	1.14
850	vps1302	0.73	0.86	1.1
851	ekc1	0.74	0.85	1.06
852	pam14	0.75	0.81	1.08
853	eta2	0.76	0.79	1.05
854	SPAC27E2.04c	0.74	0.8	1.04
855	SPAC22E12.05c	0.77	0.81	1.03
856	SPBC1539.07c	0.77	0.82	1.01
857	rps401	0.75	0.82	1.02
858	SPCC553.04	0.71	0.86	1.02
859	meu6	0.67	0.86	1.03
860	SPCC1020.07	0.72	0.8	1.07
861	skb1	0.7	0.82	1.07
862	rev3	0.69	0.81	1.04
863	egd2	0.71	0.79	1.03
864	SPCC622.02	0.7	0.79	1.04
865	SPAC23H4.13c	0.7	0.79	1.03
866	mcs4	0.66	0.8	1.07
867	SPCC1442.14c	0.67	0.82	1.03
868	SPBC30D10.14	0.76	0.75	1.03
869	pgp2	0.74	0.75	1.04
870	SPBC1685.12c	0.73	0.74	1.03
871	gut2	0.74	0.7	1.03
872	SPAC2F7.17	0.69	0.77	1.08
873	spn4	0.65	0.74	1.09
874	SPAC212.04c	0.7	0.73	1.03
875	rps1502	0.65	0.87	1.22
876	rps902	0.59	0.87	1.18
877	rga3	0.59	0.85	1.17
878	SPAC25B8.18	0.63	0.81	1.21
879	SPAC1A6.01c	0.62	0.81	1.18
880	dsd1	0.52	0.87	1.16
881	mus81	0.59	0.89	1.13
882	agn2	0.61	0.86	1.12
883	SPAC22E12.19	0.57	0.86	1.1
884	chs2	0.62	0.84	1.13
885	sif2	0.6	0.84	1.1
886	pfa3	0.59	0.81	1.11
887	hus1	0.62	0.85	1.02
888	set6	0.57	0.84	1.05
889	are1	0.58	0.86	1.02
890	SPAC23D3.13c	0.53	0.8	1.03
891	SPBC4B4.04	0.66	0.77	1.15
892	bgl2	0.64	0.76	1.14
893	SPAPB24D3.07c	0.61	0.74	1.17
894	mug9	0.61	0.77	1.13
895	SPAC1420.01c	0.53	0.71	1.2
896	sdh4	0.51	0.77	1.16
897	cox4	0.53	0.75	1.12
898	SPAPB1E7.08c	0.57	0.55	1.18
899	gfh1	0.6	0.75	1.07
900	pvg3	0.63	0.73	1.04
901	SPBC1773.02c	0.65	0.71	1.04
902	atg9	0.64	0.73	1.01
903	mhf2	0.57	0.78	1.09
904	ptc4	0.54	0.76	1.07
905	SPBC1773.04	0.72	0.85	0.97
906	SPAC1B3.02c	0.75	0.79	0.97
907	SPAC29B12.13	0.72	0.81	0.93
908	SPAC2G11.04	0.73	0.79	0.94
909	SPAC29B12.12	0.73	0.79	0.94
910	alt1	0.69	0.86	0.96
911	SPAC1142.02c	0.67	0.87	0.92
912	SPBC691.05c	0.68	0.85	0.93
913	SPAC29E6.07	0.64	0.84	0.95
914	SPAC29B12.06c	0.67	0.79	1
915	SPAC23C11.07	0.66	0.81	0.93
916	SPAC24C9.08	0.75	0.8	0.91
917	jmj2	0.73	0.81	0.9
918	moc3	0.69	0.85	0.87
919	arp6	0.67	0.81	0.89
920	SPAC2C4.06c	0.66	0.81	0.89
921	mal1	0.66	0.8	0.89
922	agn1	0.66	0.82	0.86
923	pof2	0.66	0.8	0.86
924	SPCC70.04c	0.74	0.76	0.99
925	SPAC22G7.03	0.69	0.75	0.93
926	set11	0.73	0.71	0.97
927	SPAC31A2.12	0.69	0.7	0.94
928	sfr1	0.64	0.77	0.98
929	myo52	0.65	0.75	0.94
930	SPBC1711.09c	0.73	0.75	0.92
931	wtf1	0.75	0.74	0.88
932	dph1	0.73	0.76	0.89
933	SPAC2E12.03c	0.72	0.76	0.87
934	mss1	0.7	0.76	0.86
935	SPAC2F3.05c	0.75	0.7	0.86
936	SPAC6F6.03c	0.7	0.71	0.91
937	SPAC22H10.11c	0.64	0.74	0.91
938	SPBC1348.07	0.59	0.8	1.02
939	SPAC1F12.04c	0.6	0.74	1
940	SPAC2F7.04	0.6	0.78	0.96
941	SPAC22F3.04	0.59	0.77	0.95
942	SPAC227.06	0.63	0.74	0.95
943	SPAC22H10.06c	0.6	0.73	0.97
944	SPAC2E1P3.01	0.57	0.82	0.98
945	fft2	0.55	0.79	1.02
946	SPBC19F8.02	0.56	0.78	1.01
947	SPBC713.03	0.52	0.79	1
948	SPBC215.11c	0.55	0.79	0.94
949	SPCC126.11c	0.55	0.75	0.94
950	SPBC20F10.07	0.62	0.86	0.87
951	lag1	0.63	0.83	0.9
952	SPBC1198.07c	0.61	0.79	0.86
953	csx1	0.61	0.79	0.83
954	SPAC29E6.05c	0.55	0.82	0.91
955	rps403	0.52	0.79	0.86
956	SPBC23G7.10c	0.57	0.73	0.91
957	SPAC29B12.02c	0.52	0.76	0.9
958	SPAC2E1P3.05c	0.57	0.77	0.85
959	SPAC22H10.08	0.59	0.66	0.93
960	pof10	0.56	0.64	0.88
961	tht2	0.59	0.56	0.9
962	rex3	1	0.47	1.12
963	SPBC83.05	0.91	0.43	1.14
964	SPAC3F10.17	0.8	0.26	1.21
965	spo5	0.7	0.21	1.19
966	alo1	0.68	0.4	1
967	SPBP8B7.10c	0.67	0.29	1.04
968	SPAC1399.04c	0.65	0.26	0.86
969	zta1	0.51	0.35	1
970	mug183	0.78	0	1.06
971	sft2	0.73	0.13	0.9
972	SPAC1142.01	0.79	0	0.92
973	SPBC11B10.08	0.78	0	0.85
974	SPAC1687.09	0.31	1.14	1.44
975	SPCC965.06	0.43	1.15	1.32
976	abc2	0.4	1.16	1.31
977	SPCC4G3.17	0.43	1.11	1.28
978	amt3	0.37	1.09	1.3
979	SPBC17D11.08	0.48	0.81	1.46
980	rps1902	0.47	0.87	1.41
981	SPBC23G7.14	0.49	0.84	1.38
982	SPBC354.04	0.44	0.83	1.43
983	SPAC1783.07c	0.4	0.81	1.43
984	raf1	0.23	0.91	1.38
985	rps2302	0.44	0.73	1.55
986	SPAC1F7.08	0.43	0.62	1.58
987	fma2	0.51	0.65	1.38
988	SPAC23C11.06c	0.44	0.65	1.43
989	sub1	0.49	0.93	1.19
990	rba50	0.43	0.88	1.24
991	gnr1	0.35	0.86	1.32
992	SPBC428.11	0.36	0.88	1.19
993	frp1	0.5	0.74	1.27
994	slx4	0	1.19	1.68
995	alp16	0.18	1.18	1.35
996	dbp2	0	1.19	1.33
997	SPAC977.11	0.04	1.02	1.34
998	SPAC1399.01c	0.09	1.06	1.29
999	SPBC8E4.01c	0	0.83	1.65
1000	SPAC637.06	0	0.92	1.54
1001	SPAC25B8.09	0.03	0.89	1.48
1002	isp5	0	0.74	1.67
1003	mug37	0	0.69	1.65
1004	SPAC11E3.05	0.18	0.76	1.52
1005	SPAC22H10.04	0.08	0.74	1.48
1006	ptn1	0.18	0.95	1.25
1007	gef1	0	0.91	1.27
1008	gyp1	0	0.81	1.26
1009	pac2	0	0.75	1.25
1010	SPBC3B8.05	0	0.69	1.29
1011	SPBPB2B2.19c	0.48	1.09	1.21
1012	amt2	0.52	1.08	1.14
1013	but1	0.48	1.08	1.09
1014	SPCC584.15c	0.53	1.02	1.06
1015	SPCC4B3.03c	0.42	1.08	1.18
1016	SPAC17C9.12	0.38	1.1	1.13
1017	SPCC1450.09c	0.38	1.04	1.15
1018	SPAC589.03c	0.37	1.05	1.14
1019	rpm2	0.48	1.14	1.01
1020	ypa1	0.46	1.12	0.98
1021	SPBC18E5.08	0.49	1.05	1.03
1022	meu8	0.5	1.09	0.92
1023	mfs2	0.44	1.07	0.88
1024	SPBC2A9.07c	0.44	1.04	0.9
1025	ell1	0.54	1.02	1.03
1026	SPBC1709.16c	0.53	1.02	1.01
1027	SPAC1952.06c	0.48	0.96	0.98
1028	ape2	0.45	1.03	0.99
1029	trm8	0.39	1.01	1.02
1030	SPBC577.03c	0.45	0.94	1.03
1031	SPBC115.03	0.4	0.97	1.01
1032	nta1	0.42	0.98	0.96
1033	SPAC7D4.08	0.4	1.01	0.87
1034	naa20	0.4	0.93	0.93
1035	atg20	0.32	1.13	0.99
1036	SPAC3H1.06c	0.37	1.16	0.88
1037	puf6	0.35	1.08	0.92
1038	SPBC119.03	0.29	1.08	0.97
1039	SPBC17D1.02	0.29	1.14	0.89
1040	atg22	0.22	1.12	0.92
1041	SPCC4B3.06c	0.32	1.03	1.02
1042	SPBC18E5.10	0.38	0.92	1.01
1043	mto2	0.34	0.94	1.03
1044	mfm2	0.34	1.03	0.93
1045	ade1	0.27	0.97	0.9
1046	pvg1	0.3	0.93	0.86
1047	SPBC1E8.03c	0.48	0.83	1.15
1048	gdh2	0.52	0.76	1.08
1049	SPBC365.01	0.51	0.75	1.09
1050	rps3002	0.49	0.71	1.09
1051	inv1	0.4	0.8	1.19
1052	SPAC212.08c	0.42	0.81	1.13
1053	SPBC1711.05	0.42	0.79	1.11
1054	SPBC21C3.14c	0.52	0.86	1.03
1055	msd1	0.49	0.87	1.02
1056	sck1	0.48	0.88	1.01
1057	SPBP35G2.11c	0.45	0.82	1.05
1058	mrs2	0.46	0.74	1.03
1059	SPCC5E4.05c	0.24	0.95	1.15
1060	ash2	0.3	0.85	1.17
1061	pab2	0.28	0.83	1.15
1062	csn71	0.28	0.91	1.09
1063	SPBC1348.11	0.25	0.87	1.11
1064	pdt1	0.2	0.94	1.03
1065	SPBP8B7.02	0.36	0.77	1.23
1066	SPCC594.02c	0.35	0.72	1.15
1067	SPBC215.01	0.28	0.8	1.18
1068	ctu2	0.33	0.77	1.02
1069	nup132	0.32	0.7	1.03
1070	shm2	0.51	0.83	0.98
1071	SPAC1A6.07	0.51	0.85	0.93
1072	SPAC2E1P5.03	0.44	0.86	0.98
1073	rpl2701	0.45	0.82	0.98
1074	SPBC17D11.04c	0.53	0.9	0.87
1075	SPCC1183.11	0.48	0.85	0.88
1076	SPCC1442.07c	0.49	0.82	0.9
1077	mcp3	0.45	0.94	0.86
1078	ace2	0.39	0.93	0.86
1079	cut8	0.43	0.88	0.87
1080	mug97	0.32	0.93	0.95
1081	omt2	0.32	0.84	0.97
1082	SPAC105.02c	0.35	0.84	0.86
1083	SPCC70.02c	0.29	0.83	0.89
1084	SPBC16G5.06	0.29	0.85	0.85
1085	SPBC29A10.09c	0.27	0.89	0.92
1086	SPAC1635.01	0.24	0.85	0.9
1087	SPCC663.15c	0.2	0.91	0.95
1088	sgo2	0.23	0.82	0.85
1089	iws1	0.36	0.75	1
1090	SPBC8D2.02c	0.36	0.71	0.96
1091	SPBC216.01c	0.26	0.76	0.99
1092	bag101	0.21	0.74	0.9
1093	ptf2	0.11	0.95	1.18
1094	SPCC162.11c	0.08	0.96	1.13
1095	fep1	0	1	1.21
1096	SPCP20C8.03	0	1.06	1.14
1097	SPBC1685.04	0.12	1.12	1.03
1098	SPBC119.16c	0.14	1.04	1.08
1099	SPAC23A1.19c	0	1.09	1.03
1100	uvi31	0	1.03	1.04
1101	pof8	0.1	0.97	1.08
1102	SPBC660.10	0	0.92	1.03
1103	dus3	0.16	1.06	0.97
1104	erd2	0	1.09	0.88
1105	SPAC17A5.05c	0.02	1.04	0.91
1106	gyp51	0.15	0.86	0.9
1107	ulp1	0.06	0.88	0.86
1108	snt2	0	0.94	0.89
1109	vrp1	0	0.93	0.9
1110	mad2	0	0.91	0.91
1111	SPCC777.17c	0	0.91	0.88
1112	nfs1	0	0.89	0.86
1113	ef1a-a	0.24	0.85	1.03
1114	pmm1	0.18	0.81	1.08
1115	yox1	0.15	0.83	1.16
1116	SPAC25A8.02	0.1	0.83	1.08
1117	mex67	0.21	0.73	1.09
1118	kin1	0.21	0.67	1.11
1119	rps502	0.24	0.64	1.09
1120	SPAC3H1.08c	0.14	0.68	1.13
1121	akr1	0	0.79	1.04
1122	gpd3	0	0.82	1.01
1123	msc1	0	0.79	1
1124	SPBC56F2.08c	0	0.75	0.99
1125	fis1	0	0.73	1.13
1126	cox8	0	0.69	1.13
1127	SPBC409.19c	0.08	0.69	1.03
1128	SPAC26H5.02c	0	0.73	1.04
1129	pxl1	0	0.72	1.03
1130	gpa2	0	0.68	1.03
1131	pmc1	0	0.66	1.05
1132	sxa1	0	0.66	1
1133	SPAC29A4.02c	0	0.85	0.98
1134	top1	0	0.85	0.96
1135	sec63	0	0.82	0.94
1136	SPAC25B8.11	0	0.77	0.95
1137	cip1	0	0.83	0.86
1138	zip1	0	0.76	0.88
1139	cbs2	0	0.73	0.89
1140	SPBC215.06c	0	0.75	0.86
1141	SPBC216.04c	0	0.75	0.84
1142	mod21	0	0.72	0.85
1143	aap1	0.45	0.41	1.26
1144	rga5	0.46	0.41	1.2
1145	SPAC11E3.10	0.26	0.41	1.25
1146	gyp7	0.36	0.35	1.1
1147	tif512	0	0.49	1.62
1148	SPBC660.17c	0.14	0.64	1.14
1149	SPBC1861.05	0.15	0.48	1.13
1150	ccr1	0	0.43	1.29
1151	SPBC32F12.07c	0	0.35	1.21
1152	SPBC30B4.06c	0.47	0.6	1.02
1153	SPAC30D11.06c	0.45	0.69	0.89
1154	rpp202	0.45	0.59	0.89
1155	SPAC2G11.03c	0.42	0.61	0.89
1156	yip11	0.37	0.67	0.95
1157	meu18	0.3	0.58	0.86
1158	SPBC16H5.08c	0.18	0.63	0.95
1159	yaf9	0.11	0.51	0.98
1160	rho5	0.08	0.36	1.04
1161	SPAC688.12c	0.25	0	1.53
1162	rga1	0.32	0.21	1.19
1163	SPAC22E12.03c	0.52	0	1.33
1164	SPAC1B3.04c	0.45	0.05	1.26
1165	SPAC30D11.02c	0.23	0.26	1.02
1166	hob3	0	0.27	0.88
1167	SPCC285.10c	0	0.03	1.09
1168	arg12	3	3	0.63
1169	SPACUNK4.17	1.43	2.69	0.5
1170	but2	0.83	2.94	0.79
1171	mug15	0.76	3	0.7
1172	rpl3702	0.66	2.66	0.52
1173	hsp16	1.23	2.71	0
1174	SPBC409.16c	1.08	2.33	0.28
1175	rpl801	0.99	2.36	0.32
1176	SPAPB1A10.14	0.81	2.41	0
1177	SPAC11D3.15	1.36	1.58	0.63
1178	iwr1	1.32	1.58	0.64
1179	tfs1	1.21	1.7	0.68
1180	yps1	1.24	1.54	0.77
1181	hhp2	1.4	1.64	0.49
1182	mad1	1.47	1.82	0.34
1183	rsp1	1.59	1.66	0.34
1184	meu10	1.34	1.46	0.29
1185	ada1	1.22	1.45	0.31
1186	mug33	1.24	1.56	0.16
1187	SPBC31F10.17c	1.07	1.83	0.75
1188	urg3	0.91	1.9	0.56
1189	rps1101	0.93	1.78	0.63
1190	SPBC15C4.04c	0.9	1.74	0.61
1191	spe1	0.73	2.11	0.73
1192	mug126	0.64	2.18	0.49
1193	ppr8	0.77	1.92	0.75
1194	asl1	0.54	1.87	0.83
1195	SPAC24B11.07c	0.74	1.77	0.55
1196	gst1	0.93	1.62	0.79
1197	atb2	0.87	1.59	0.82
1198	rpl4302	0.84	1.44	0.82
1199	SPAC26F1.12c	1.03	1.67	0.54
1200	bun107	0.84	1.64	0.63
1201	SPCC1020.13c	0.89	1.53	0.68
1202	mak1	0.91	1.5	0.67
1203	SPCC11E10.09c	0.63	1.69	0.73
1204	spn1	0.65	1.62	0.62
1205	SPAC19A8.14	0.67	1.55	0.46
1206	SPAC1F12.05	0.75	1.42	0.64
1207	mug132	1	1.81	0.34
1208	atf21	0.88	1.73	0.31
1209	SPBC1198.06c	0.73	1.73	0.26
1210	rox3	0.62	1.69	0.09
1211	SPBC409.17c	0.62	1.62	0.09
1212	SPBC1683.03c	1.41	1.37	0.75
1213	put4	1.31	1.28	0.76
1214	SPAC1D4.02c	1.25	1.27	0.72
1215	SPAC17H9.13c	1.46	1.09	0.76
1216	SPAC17G8.02	1.42	1.05	0.74
1217	SPAC11D3.04c	1.28	1.14	0.85
1218	spo3	1.25	1.18	0.72
1219	SPAC11D3.02c	1.27	1.15	0.74
1220	SPCC1494.09c	1.2	1.38	0.82
1221	SPAC1039.02	1.2	1.07	0.85
1222	nop12	1.2	1.09	0.8
1223	SPAC17A2.11	1.11	1.08	0.87
1224	SPCC965.11c	1.09	1.13	0.71
1225	apn1	1.11	1.05	0.71
1226	mam2	1.08	1.05	0.69
1227	SPBC1652.02	1.12	1.04	0.66
1228	mug105	1.26	1.32	0.56
1229	SPAC23H3.15c	1.22	1.3	0.57
1230	eng2	1.26	1.23	0.58
1231	SPAC23H4.16c	1.25	1.23	0.49
1232	SPAC26H5.07c	1.16	1.24	0.51
1233	SPAC26H5.09c	1.37	1.1	0.62
1234	SPAC26H5.04	1.3	1.18	0.6
1235	SPAC25B8.15c	1.24	1.14	0.59
1236	SPAC25B8.17	1.28	1.07	0.53
1237	cam2	1.11	1.17	0.59
1238	SPAC23D3.05c	1.19	1.06	0.56
1239	pof14	0.98	1.23	0.82
1240	SPAC186.06	0.94	1.16	0.77
1241	exg2	0.99	1.19	0.72
1242	pmc3	0.88	1.29	0.78
1243	clr5	0.89	1.19	0.81
1244	SPAC3A11.13	0.94	1.06	0.82
1245	SPAP27G11.11c	0.96	1.03	0.84
1246	hst2	1.01	1.02	0.74
1247	SPAC30D11.14c	0.93	1.03	0.79
1248	atm1	0.94	1.02	0.76
1249	SPAC139.05	0.89	1.1	0.79
1250	SPBC16A3.17c	0.87	1.12	0.76
1251	meu34	0.84	1.09	0.76
1252	SPAC13C5.04	0.91	1.04	0.81
1253	ade2	0.87	1.07	0.81
1254	dcc1	0.91	1.04	0.76
1255	ago1	1.01	1.04	0.69
1256	SPCC338.18	1.03	1.05	0.66
1257	ade3	0.95	1.12	0.69
1258	SPAC23C11.01	0.94	1.06	0.7
1259	pub3	0.94	0.99	0.72
1260	apt1	0.96	1.01	0.69
1261	cmb1	0.96	1	0.67
1262	SPBC83.09c	0.95	1.01	0.65
1263	SPCC126.04c	0.95	0.97	0.65
1264	SPBC1105.13c	0.87	1.11	0.7
1265	whi5	0.9	1.01	0.7
1266	SPAC186.03	0.85	1.05	0.71
1267	kha1	0.85	1.05	0.69
1268	cdd1	0.87	1.09	0.65
1269	clp1	0.89	1.04	0.65
1270	SPAC30C2.04	0.89	1.05	0.62
1271	cho2	0.85	1.03	0.65
1272	rhp41	1.02	1.28	0.55
1273	ubr11	1.02	1.25	0.56
1274	SPAC12B10.15c	0.88	1.27	0.61
1275	SPAC6C3.08	0.91	1.2	0.58
1276	mei4	0.88	1.2	0.6
1277	ubc14	0.89	1.17	0.56
1278	SPAC29A4.09	0.99	1.07	0.59
1279	SPCC830.10	1.04	1.05	0.52
1280	ppk31	1.01	1.02	0.53
1281	rrp16	0.95	1.04	0.52
1282	SPBC839.03c	0.95	0.96	0.55
1283	SPBC30D10.03c	1.04	1.03	0.47
1284	SPCC338.06c	1.01	1.05	0.49
1285	sec2302	0.96	1.01	0.44
1286	mug164	0.99	0.97	0.48
1287	mmd1	0.91	1.12	0.57
1288	SPBC354.15	0.9	1.1	0.54
1289	SPAC30C2.08	0.9	1.05	0.53
1290	SPCC61.05	0.94	1.12	0.48
1291	yam8	0.92	1.05	0.48
1292	SPBC902.03	0.85	1.06	0.5
1293	rpl24	0.9	0.98	0.6
1294	rps2602	0.91	1.01	0.55
1295	SPAC23A1.17	0.88	1.01	0.57
1296	pku70	0.89	1	0.54
1297	fft1	0.86	1.02	0.45
1298	sec20	0.89	0.99	0.46
1299	hmt1	0.86	0.98	0.48
1300	SPAC227.15	1.36	0.93	0.9
1301	red1	1.28	0.93	0.84
1302	SPAC25B8.07c	1.15	0.97	0.77
1303	SPAP27G11.12	1.11	0.96	0.78
1304	SPAC343.06c	1.17	0.86	0.69
1305	apc14	1.05	0.94	0.82
1306	SPAC1B1.04c	1.06	0.95	0.76
1307	rps1001	1.12	0.72	0.8
1308	mal3	1.18	0.78	0.71
1309	SPBC1683.06c	1.06	0.61	0.79
1310	msh1	1.27	0.97	0.62
1311	pcf2	1.3	0.96	0.57
1312	SPAC11D3.01c	1.29	0.87	0.63
1313	rad13	1.4	0.88	0.42
1314	mug106	1.2	0.93	0.57
1315	SPAC4H3.04c	1.16	0.96	0.61
1316	caf16	1.12	0.98	0.58
1317	SPAC12B10.13	1.09	0.91	0.61
1318	adg2	1.11	0.91	0.52
1319	SPBC725.05c	1.18	0.87	0.48
1320	SPAC17A2.14	1.15	0.82	0.5
1321	SPAC6B12.06c	1.23	0.72	0.64
1322	erg2	1.09	0.67	0.66
1323	mad3	0.96	0.89	0.85
1324	sgo1	0.93	0.95	0.78
1325	SPBC15D4.05	0.96	0.9	0.79
1326	SPAC17C9.11c	0.95	0.88	0.77
1327	SPBC215.10	1.02	0.92	0.73
1328	nnt1	1.04	0.9	0.7
1329	SPBC26H8.11c	0.97	0.95	0.75
1330	rgs1	0.98	0.97	0.71
1331	SPAC17A2.10c	0.95	0.92	0.71
1332	cit1	0.93	0.92	0.72
1333	atp11	0.93	0.89	0.74
1334	SPAC6F12.04	0.93	0.92	0.68
1335	SPAC3H5.11	0.94	0.88	0.7
1336	SPAC11D3.08c	0.92	0.93	0.82
1337	omh2	0.9	0.92	0.8
1338	SPBC21C3.06	0.87	0.95	0.81
1339	SPBC8E4.04	0.87	0.9	0.79
1340	get3	0.9	0.97	0.75
1341	SPAC11D3.17	0.91	0.92	0.77
1342	stt4	0.9	0.93	0.76
1343	gcv2	0.85	0.98	0.7
1344	SPBC2D10.11c	0.9	0.92	0.71
1345	SPBC15C4.06c	0.87	0.94	0.72
1346	prz1	0.85	0.92	0.72
1347	mug100	0.85	0.91	0.73
1348	hob1	0.88	0.92	0.67
1349	gpd1	0.9	0.89	0.67
1350	cti6	0.89	0.86	0.69
1351	SPAC323.05c	1.03	0.84	0.78
1352	bis1	1.05	0.86	0.71
1353	cwc27	0.96	0.86	0.81
1354	meu1-1	0.96	0.84	0.73
1355	fkbp39	0.97	0.69	0.73
1356	SPAC26A3.14c	0.91	0.82	0.83
1357	SPBC3E7.12c	0.87	0.83	0.8
1358	SPCC24B10.02c	0.87	0.8	0.78
1359	bqt1	0.9	0.86	0.73
1360	SPAC24B11.05	0.9	0.82	0.74
1361	SPAC2F7.02c	0.85	0.85	0.75
1362	mug161	0.93	0.79	0.76
1363	txl1	0.94	0.75	0.78
1364	SPAC2C4.16c	0.88	0.78	0.82
1365	sts5	0.9	0.73	0.81
1366	SPAC18B11.08c	1.02	0.99	0.6
1367	sws1	1.02	0.93	0.65
1368	SPAC869.02c	0.99	0.9	0.61
1369	glo1	1.03	0.92	0.57
1370	syn1	0.98	0.88	0.67
1371	SPAC926.06c	1	0.85	0.64
1372	SPBC20F10.03	1.02	0.85	0.59
1373	mug185	0.98	0.8	0.57
1374	cta5	0.95	0.93	0.63
1375	SPAC644.09	0.94	0.9	0.59
1376	tpi1	0.94	0.87	0.6
1377	rlp1	0.93	0.83	0.62
1378	SPBC1271.10c	0.94	0.81	0.64
1379	SPCC736.13	0.9	0.89	0.61
1380	pkp1	0.9	0.85	0.65
1381	mug51	0.9	0.84	0.64
1382	SPAC1327.01c	0.9	0.83	0.63
1383	SPAC869.06c	0.87	0.85	0.64
1384	SPBC16C6.03c	0.87	0.85	0.62
1385	rtf1	0.86	0.84	0.6
1386	rpl1801	0.85	0.84	0.6
1387	emp24	0.87	0.97	0.53
1388	SPCC569.06	0.89	0.93	0.55
1389	SPAC32A11.02c	1	0.85	0.51
1390	SPBC1685.14c	0.94	0.86	0.49
1391	stm1	0.96	0.87	0.47
1392	arg7	0.96	0.79	0.5
1393	SPAC57A7.12	0.97	0.85	0.43
1394	xlf1	0.92	0.87	0.55
1395	SPBC3E7.05c	0.91	0.85	0.51
1396	SPBC660.08	0.86	0.86	0.51
1397	exg1	0.91	0.79	0.45
1398	SPCC1682.13	1.03	0.72	0.54
1399	spf31	0.96	0.72	0.53
1400	pex13	0.96	0.71	0.51
1401	mug166	0.93	0.65	0.55
1402	SPAC10F6.13c	0.97	0.58	0.48
1403	arg11	0.9	0.66	0.62
1404	SPAC1805.10	0.84	0.71	0.6
1405	ski3	0.9	0.6	0.6
1406	caf1	0.91	0.76	0.46
1407	SPBC16G5.02c	0.84	0.71	0.48
1408	SPBC365.04c	0.86	0.65	0.51
1409	rnh1	0.87	0.68	0.45
1410	SPCC162.06c	0.85	1.33	0.82
1411	SPCC18B5.10c	0.73	1.34	0.76
1412	SPCC1442.13c	0.71	1.28	0.78
1413	fml2	0.77	1.32	0.69
1414	mug154	0.83	1.24	0.73
1415	wis2	0.86	1.15	0.72
1416	SPAC227.04	0.8	1.16	0.74
1417	SPCC330.07c	0.78	1.17	0.74
1418	SPAC15F9.01c	0.75	1.18	0.76
1419	mug125	0.77	1.16	0.69
1420	SPAC140.04	0.75	1.17	0.69
1421	SPBC887.16	0.62	1.39	0.82
1422	SPCC330.06c	0.65	1.34	0.77
1423	SPCC1672.09	0.66	1.25	0.79
1424	SPCC188.10c	0.68	1.27	0.76
1425	rec24	0.65	1.25	0.7
1426	SPAC186.05c	0.64	1.26	0.68
1427	SPAC8C9.05	0.56	1.25	0.8
1428	SPAC12B10.10	0.51	1.29	0.77
1429	byr1	0.8	1.06	0.84
1430	bzz1	0.81	1.03	0.81
1431	pmr1	0.7	1.08	0.84
1432	SPBC1105.08	0.68	1.1	0.81
1433	SPAC144.17c	0.73	1.05	0.83
1434	dsc4	0.71	1.03	0.84
1435	SPAC922.03	0.76	1.08	0.73
1436	ubp8	0.74	1.07	0.75
1437	SPAC6B12.04c	0.74	1.04	0.73
1438	SPAC14C4.11	0.77	1	0.75
1439	dak2	0.69	1.01	0.7
1440	SPAC9E9.17c	0.77	1.02	0.66
1441	SPAC14C4.01c	0.79	0.98	0.64
1442	knd1	0.76	0.99	0.67
1443	mpd2	0.63	1.11	0.81
1444	rds1	0.6	1.14	0.82
1445	SPAPB2C8.01	0.55	1.07	0.81
1446	dbr1	0.65	1.04	0.78
1447	laf1	0.63	0.98	0.83
1448	los1	0.58	1	0.83
1449	SPAC17H9.04c	0.56	1.01	0.73
1450	erg5	0.52	1.05	0.72
1451	blt1	0.53	1.02	0.73
1452	SPAC959.06c	0.8	1.24	0.63
1453	SPCC126.12	0.81	1.2	0.59
1454	SPCC794.03	0.85	1.17	0.55
1455	mug137	0.8	1.16	0.59
1456	SPCC1393.09c	0.69	1.32	0.57
1457	nhp6	0.73	1.23	0.61
1458	jmj1	0.76	1.19	0.56
1459	SPAC6G9.15c	0.72	1.17	0.54
1460	SPAC19G12.04	0.78	1.28	0.49
1461	SPAP32A8.02	0.79	1.23	0.47
1462	ypt4	0.75	1.24	0.47
1463	pex11	0.82	1.16	0.53
1464	mok11	0.83	1.15	0.51
1465	pyp1	0.78	1.15	0.49
1466	SPCC777.04	0.72	1.19	0.47
1467	SPCC1223.01	0.81	1.09	0.64
1468	SPAC17H9.12c	0.8	1.12	0.57
1469	SPAC17A5.09c	0.77	1.1	0.57
1470	SPAC24H6.11c	0.76	1.12	0.53
1471	SPAC17G6.15c	0.79	1.07	0.57
1472	fas1	0.84	1.05	0.58
1473	uve1	0.84	1.01	0.61
1474	pyp3	0.81	0.98	0.62
1475	SPBC1271.15c	0.8	1.02	0.54
1476	SPAC22F8.05	0.77	1.03	0.55
1477	SPAC57A10.08c	0.75	1.04	0.54
1478	shk2	0.77	0.98	0.57
1479	ppk34	0.79	1.13	0.5
1480	SPAC869.05c	0.75	1.11	0.5
1481	SPAC17C9.02c	0.76	1.12	0.48
1482	SPAC27F1.05c	0.75	1.08	0.47
1483	SPCC5E4.10c	0.82	1.11	0.42
1484	liz1	0.82	1.08	0.44
1485	SPBC947.06c	0.8	1.09	0.43
1486	hem2	0.78	1.09	0.4
1487	gly1	0.79	1.06	0.42
1488	not3	0.76	1.11	0.44
1489	cfh1	0.73	1.13	0.43
1490	SPCC188.09c	0.55	1.33	0.65
1491	rtf2	0.55	1.29	0.59
1492	wtf11	0.54	1.31	0.53
1493	SPCC162.01c	0.61	1.23	0.61
1494	cid16	0.61	1.18	0.62
1495	mug58	0.52	1.21	0.53
1496	gmh2	0.59	1.19	0.48
1497	ght6	0.61	1.22	0.44
1498	SPBC25B2.01	0.58	1.2	0.39
1499	rpl102	0.48	1.19	0.46
1500	SPBC1271.07c	0.67	1.1	0.63
1501	SPCC613.02	0.63	1.12	0.59
1502	osm1	0.67	1.05	0.6
1503	SPBC725.01	0.62	1.12	0.54
1504	meu26	0.6	1.09	0.51
1505	SPAC3H8.04	0.65	1.06	0.55
1506	thi9	0.64	1.06	0.56
1507	swc3	0.66	1.01	0.51
1508	mok14	0.57	1.11	0.55
1509	SPCC584.03c	0.52	1.02	0.52
1510	eaf1	0.51	1.14	0.44
1511	spf38	0.51	1.1	0.45
1512	fhl1	0.63	1.04	0.45
1513	srp1	0.61	0.99	0.47
1514	rec15	0.59	1.03	0.41
1515	SPAPJ691.02	0.83	0.97	0.77
1516	SPBP8B7.31	0.84	0.95	0.76
1517	sst4	0.8	0.92	0.78
1518	oac1	0.81	0.9	0.77
1519	rpt4	0.81	0.85	0.83
1520	rfp1	0.83	0.87	0.76
1521	pcl1	0.84	0.85	0.75
1522	mtg1	0.78	0.85	0.78
1523	SPAC9.08c	0.8	0.88	0.75
1524	acp1	0.78	0.86	0.74
1525	SPBC16E9.02c	0.8	0.79	0.82
1526	SPAC12B10.01c	0.78	0.8	0.8
1527	ght4	0.79	0.78	0.78
1528	SPBC2A9.03	0.75	0.86	0.85
1529	cwf16	0.76	0.86	0.84
1530	zym1	0.73	0.86	0.81
1531	SPBC800.11	0.68	0.89	0.83
1532	SPAC1A6.03c	0.7	0.85	0.84
1533	rpl2002	0.69	0.85	0.82
1534	kap95	0.71	0.8	0.85
1535	SPBC21B10.07	0.68	0.81	0.84
1536	nrl1	0.71	0.93	0.76
1537	SPAC57A7.13	0.72	0.91	0.73
1538	dsc2	0.75	0.84	0.75
1539	SPAC6C3.02c	0.7	0.81	0.77
1540	SPAC9E9.15	0.83	0.91	0.66
1541	SPAC12G12.09	0.79	0.93	0.7
1542	mug5	0.81	0.88	0.66
1543	ppk2	0.84	0.9	0.62
1544	SPAC4G9.14	0.72	0.92	0.68
1545	cao1	0.76	0.94	0.64
1546	cox24	0.75	0.92	0.64
1547	ptc3	0.74	0.93	0.65
1548	SPBPB2B2.07c	0.72	0.88	0.68
1549	SPBC18H10.05	0.78	0.87	0.71
1550	SPAC922.07c	0.79	0.86	0.69
1551	SPAP8A3.07c	0.81	0.84	0.68
1552	mei3	0.78	0.84	0.7
1553	sld3	0.81	0.81	0.69
1554	SPBC1604.16c	0.81	0.8	0.7
1555	fib1	0.78	0.8	0.67
1556	sec74	0.75	0.86	0.72
1557	SPCC736.09c	0.71	0.83	0.74
1558	SPBC106.03	0.73	0.85	0.69
1559	SPAC2F7.09c	0.7	0.8	0.73
1560	SPAC14C4.04	0.66	0.98	0.74
1561	cta3	0.67	0.93	0.72
1562	man1	0.67	0.86	0.77
1563	SPAC186.04c	0.64	0.84	0.71
1564	not2	0.66	0.81	0.71
1565	mdl1	0.69	0.83	0.67
1566	SPAC4G8.04	0.66	0.8	0.68
1567	swi3	0.63	0.87	0.68
1568	pub2	0.63	0.86	0.64
1569	spk1	0.61	0.87	0.63
1570	SPAC8E11.01c	0.51	0.97	0.79
1571	hmt2	0.5	0.95	0.81
1572	SPBC18H10.21c	0.49	0.94	0.76
1573	SPCC1183.07	0.59	0.94	0.71
1574	plg7	0.58	0.9	0.72
1575	SPAC13G7.09c	0.53	0.88	0.7
1576	ssa1	0.55	0.81	0.7
1577	atf31	0.57	0.79	0.67
1578	mug65	0.81	0.71	0.77
1579	SPACUNK4.11c	0.78	0.72	0.74
1580	SPBC215.13	0.77	0.68	0.79
1581	rpc82	0.77	0.66	0.77
1582	SPCC11E10.07c	0.86	0.79	0.68
1583	cyp7	0.86	0.77	0.67
1584	SPBC1A4.04	0.72	0.73	0.84
1585	SPAC23G3.12c	0.73	0.75	0.81
1586	SPBP16F5.08c	0.73	0.72	0.79
1587	SPAC23A1.09	0.67	0.75	0.83
1588	ibp1	0.69	0.77	0.79
1589	SPBC13E7.11	0.68	0.77	0.79
1590	sib1	0.73	0.78	0.75
1591	trm13	0.72	0.77	0.7
1592	SPCC297.05	0.7	0.77	0.71
1593	hrp3	0.69	0.77	0.71
1594	rhp51	0.7	0.78	0.68
1595	SPBC1348.01	0.73	0.69	0.72
1596	SPAC3G9.11c	0.73	0.58	0.72
1597	SPAC13G6.09	0.75	0.49	0.73
1598	ucp12	0.63	0.72	0.68
1599	SPAC8C9.04	0.63	0.67	0.73
1600	cbf11	0.55	0.77	0.7
1601	SPAC869.03c	0.57	0.72	0.72
1602	alg14	0.59	0.7	0.71
1603	SPBC1198.01	0.56	0.68	0.73
1604	mss51	0.58	0.72	0.68
1605	ies4	0.57	0.7	0.7
1606	SPAC18B11.03c	0.5	0.7	0.73
1607	SPAC20H4.08	0.62	0.53	0.81
1608	SPBC30B4.02c	0.64	0.55	0.73
1609	SPAC3A12.06c	0.81	0.94	0.6
1610	SPBC582.08	0.85	0.95	0.56
1611	SPAC4G9.20c	0.87	0.93	0.53
1612	SPCC1840.12	0.76	0.97	0.59
1613	sod22	0.73	0.97	0.56
1614	SPAC31G5.21	0.7	0.96	0.56
1615	csn3	0.71	0.96	0.52
1616	uep1	0.75	0.89	0.62
1617	SPAC922.06	0.75	0.86	0.64
1618	taz1	0.77	0.87	0.6
1619	mug129	0.82	0.88	0.57
1620	SPAC16E8.17c	0.8	0.89	0.56
1621	SPAC19B12.11c	0.8	0.85	0.56
1622	SPBC13E7.07	0.75	0.9	0.57
1623	rad22	0.78	0.84	0.61
1624	mpr1	0.8	0.79	0.61
1625	mst2	0.81	0.79	0.55
1626	SPBC3H7.13	0.74	0.83	0.61
1627	utp20	0.75	0.81	0.58
1628	SPBC3B8.06	0.71	0.82	0.55
1629	SPCC61.03	0.81	0.91	0.51
1630	SPAC22E12.18	0.85	0.9	0.47
1631	gep4	0.82	0.92	0.47
1632	atg1	0.82	0.9	0.43
1633	amk2	0.74	0.91	0.49
1634	SPBC543.05c	0.74	0.9	0.47
1635	ssb3	0.77	0.9	0.44
1636	omh1	0.76	0.91	0.42
1637	SPBPB2B2.18	0.77	0.88	0.45
1638	SPBC713.05	0.73	0.92	0.44
1639	tal1	0.8	0.86	0.49
1640	hop1	0.79	0.83	0.47
1641	mug93	0.84	0.79	0.47
1642	vps3	0.77	0.81	0.45
1643	mug182	0.68	0.94	0.62
1644	tco1	0.7	0.94	0.59
1645	SPCC594.06c	0.66	0.94	0.55
1646	SPBP4H10.16c	0.64	0.89	0.55
1647	SPACUNK4.08	0.57	0.95	0.61
1648	pfa5	0.56	0.96	0.62
1649	atg6	0.58	0.91	0.64
1650	SPCC1840.05c	0.6	0.93	0.58
1651	itr1	0.67	0.97	0.49
1652	SPBC16G5.16	0.65	0.98	0.49
1653	sde2	0.64	0.9	0.53
1654	pck1	0.64	0.93	0.47
1655	SPAC13G7.11	0.59	0.99	0.51
1656	SPBP16F5.05c	0.57	0.93	0.54
1657	SPAC328.05	0.56	0.9	0.52
1658	SPCC569.07	0.57	0.94	0.51
1659	dga1	0.58	0.94	0.49
1660	SPAC27D7.06	0.65	0.83	0.53
1661	ste4	0.65	0.83	0.52
1662	rpl401	0.64	0.79	0.51
1663	mvp1	0.65	0.89	0.44
1664	SPAC23H3.11c	0.66	0.86	0.46
1665	SPAC2C4.10c	0.6	0.87	0.46
1666	SPAC4D7.06c	0.62	0.84	0.48
1667	imp1	0.63	0.84	0.45
1668	mug151	0.63	0.82	0.44
1669	SPCC550.11	0.52	0.87	0.48
1670	png2	0.87	0.8	0.56
1671	SPBP22H7.06	0.88	0.77	0.58
1672	mug191	0.85	0.74	0.51
1673	rpn10	0.83	0.73	0.49
1674	sds23	0.77	0.74	0.56
1675	psd2	0.72	0.75	0.59
1676	SPAC29A4.06c	0.74	0.73	0.56
1677	SPBC4C3.03	0.83	0.61	0.53
1678	omh3	0.82	0.64	0.47
1679	upf3	0.81	0.57	0.48
1680	dlc1	0.75	0.51	0.46
1681	SPCC736.06	0.75	0.55	0.41
1682	ubp13	0.65	0.77	0.59
1683	bio2	0.63	0.77	0.6
1684	SPAC25B8.06c	0.66	0.74	0.62
1685	SPBC12C2.09c	0.64	0.74	0.58
1686	csn1	0.66	0.71	0.54
1687	mug103	0.56	0.77	0.53
1688	pof13	0.55	0.73	0.54
1689	spn3	0.56	0.58	0.63
1690	SPAC29A4.14c	0.57	0.66	0.54
1691	rgf2	0.6	0.59	0.51
1692	cyp1	0.68	0.73	0.48
1693	mms19	0.69	0.74	0.41
1694	SPBC21B10.08c	0.65	0.66	0.48
1695	mbx1	0.6	0.67	0.43
1696	cwf21	0.59	0.64	0.43
1697	vps32	0.53	0.71	0.44
1698	SPCC417.04	2.02	1.43	0
1699	spd1	2.04	1	0.02
1700	ubp3	1.84	1.08	0
1701	spo12	1.65	0.95	0.18
1702	cce1	1.17	1.39	0.37
1703	SPAC458.02c	1.28	1.18	0.4
1704	SPBC1683.12	1.2	1.18	0.36
1705	SPAC1F12.09	1.16	1.26	0.28
1706	SPBC8D2.16c	1	1.49	0.27
1707	rtt109	1.08	1.35	0.43
1708	SPBC13G1.04c	1.07	1.3	0.22
1709	SPBC106.12c	0.88	1.28	0.26
1710	SPCC553.05c	1.02	1.1	0.38
1711	SPAC3C7.02c	1.03	1.02	0.28
1712	SPBC83.17	1.05	1.14	0.18
1713	SPAC3C7.01c	1.12	0.96	0.23
1714	SPAC18B11.09c	0.96	1.03	0.18
1715	SPBC18H10.09	0.98	1	0.19
1716	SPBC1348.12	0.84	1.14	0.28
1717	nup131	0.88	1.07	0.3
1718	SPAC186.08c	0.89	1.09	0.26
1719	SPAC1B3.10c	0.86	1.1	0.2
1720	gtb1	0.9	1.03	0.42
1721	SPCC737.06c	0.9	1.03	0.38
1722	sds21	0.91	0.95	0.39
1723	bud6	0.87	1	0.4
1724	qcr8	0.87	0.99	0.37
1725	rps102	0.84	0.99	0.39
1726	SPAC12B10.04	0.91	1.02	0.32
1727	SPBC2A9.04c	0.94	1.01	0.28
1728	SPBC8E4.05c	0.88	0.92	0.31
1729	cuf1	0.83	0.94	0.32
1730	SPBC25B2.03	0.84	0.95	0.29
1731	SPCC584.01c	1.41	1.2	0
1732	arg6	0.87	1.31	0.13
1733	scs7	0.9	1.25	0.14
1734	SPAC806.05	0.9	1.26	0.11
1735	msh6	0.98	1.35	0
1736	SPAC637.13c	0.92	1.15	0
1737	SPBC725.10	0.82	1.16	0
1738	rtn1	1.02	0.97	0.16
1739	mde3	1.02	1.02	0.06
1740	cpd1	0.98	1.03	0
1741	can1	0.95	1.02	0
1742	SPAC1B3.01c	1.07	0.97	0
1743	nsk1	1.09	0.91	0
1744	set8	1.04	0.92	0.03
1745	SPBC14C8.11c	0.86	1.02	0.19
1746	rpl3802	0.88	0.95	0.19
1747	SPAC4G8.07c	0.88	0.96	0.15
1748	alg5	0.96	0.97	0.08
1749	scd1	0.94	0.99	0.08
1750	SPAC4G8.15c	0.91	0.99	0.05
1751	ppk32	0.92	0.99	0
1752	rgf3	0.86	1.06	0.06
1753	SPAC513.07	0.88	1.02	0
1754	tel1	0.84	0.98	0
1755	uds1	0.88	0.94	0
1756	SPBC337.02c	0.87	0.95	0
1757	thi4	0.85	0.94	0.01
1758	snu23	1.2	0.88	0.35
1759	fma1	1.38	0.66	0.29
1760	SPBC839.02	1.08	0.89	0.31
1761	SPAC1F7.11c	1.02	0.94	0.37
1762	SPAC12B10.09	1.09	0.89	0.22
1763	hri1	1.05	0.91	0.26
1764	myo51	1.01	0.89	0.27
1765	SPCC4G3.14	1.09	0.73	0.37
1766	rpl4101	1.04	0.7	0.36
1767	mei2	0.99	0.88	0.4
1768	SPAC23G3.05c	0.96	0.89	0.42
1769	apl1	0.96	0.86	0.38
1770	pit1	0.95	0.88	0.35
1771	rps3	0.94	0.83	0.36
1772	SPCC613.08	0.89	0.81	0.43
1773	tsc1	0.9	0.86	0.39
1774	SPBCPT2R1.01c	0.87	0.85	0.39
1775	hrd1	0.86	0.86	0.36
1776	hif2	0.97	0.94	0.27
1777	phx1	0.98	0.82	0.29
1778	mug86	0.88	0.85	0.31
1779	SPAC18G6.05c	0.84	0.88	0.31
1780	dil1	0.82	0.84	0.28
1781	SPCC550.07	0.9	0.8	0.27
1782	SPAC6G9.14	0.88	0.77	0.29
1783	vps8	0.9	0.81	0.22
1784	rsc58	0.92	0.73	0.43
1785	rps402	0.91	0.71	0.41
1786	SPCC364.04c	0.83	0.72	0.42
1787	SPBPB7E8.01	0.85	0.73	0.37
1788	ubp5	0.96	0.64	0.37
1789	cyp3	0.93	0.66	0.38
1790	SPCC1393.11	0.9	0.65	0.39
1791	SPCC16C4.07	0.87	0.6	0.38
1792	rad57	0.95	0.73	0.33
1793	psl1	0.84	0.74	0.32
1794	hrr1	0.85	0.71	0.33
1795	anc1	0.86	0.7	0.31
1796	rad50	0.89	0.73	0.21
1797	SPAC977.13c	0.87	0.69	0.24
1798	SPAC1486.08	0.83	0.71	0.27
1799	cfr1	0.88	0.58	0.33
1800	uap1	0.91	0.58	0.26
1801	ste13	0.85	0.65	0.24
1802	SPBC21C3.03	0.8	0.61	0.29
1803	vgl1	1.17	0.8	0.17
1804	rps601	1.08	0.79	0.22
1805	SPBC887.17	1	0.8	0.19
1806	SPAC4D7.02c	1.17	0.79	0.08
1807	psd3	1.07	0.84	0.05
1808	tup11	1	0.87	0
1809	tma23	1.03	0.75	0.09
1810	SPAC19A8.03	0.99	0.78	0.11
1811	ppk23	0.94	0.94	0.17
1812	SPBC3B9.05	0.93	0.87	0.22
1813	SPAP8A3.13c	0.94	0.88	0.15
1814	SPAC8E11.04c	0.86	0.89	0.17
1815	SPAC3G6.07	0.94	0.84	0.13
1816	SPAC1805.16c	0.95	0.84	0.1
1817	SPAC1296.05c	0.86	0.79	0.17
1818	ptc2	0.84	0.83	0.13
1819	rhp26	0.84	0.75	0.18
1820	SPAC521.03	0.88	0.9	0.09
1821	SPAC56F8.02	0.91	0.85	0
1822	med20	0.88	0.86	0
1823	SPAC513.04	0.85	0.87	0.03
1824	mde5	0.84	0.89	0
1825	pxa1	0.89	0.84	0.08
1826	SPAC4G9.12	0.92	0.83	0.02
1827	SPAC4D7.07c	0.91	0.78	0.02
1828	SPCC1235.01	0.96	0.57	0.13
1829	arg4	0.85	0.61	0.18
1830	nxt3	0.82	0.6	0.21
1831	cut9	0.82	0.59	0.21
1832	mug64	0.92	0.7	0.04
1833	SPAC56E4.07	0.9	0.66	0.03
1834	str1	0.93	0.68	0
1835	SPBC23G7.13c	0.87	0.72	0.06
1836	hos2	1	0.62	0
1837	sce3	0.91	0.6	0.09
1838	rap1	0.85	0.51	0.09
1839	SPCC191.10	0.71	1.31	0.38
1840	vph2	0.76	1.34	0.22
1841	SPAC1F3.03	0.64	1.35	0.24
1842	cch1	0.6	1.27	0.29
1843	ubi1	0.73	1.15	0.35
1844	SPBC359.06	0.67	1.12	0.33
1845	sut1	0.73	1.2	0.23
1846	SPBC31F10.12	0.62	1.14	0.32
1847	SPAC3A11.11c	0.6	1.13	0.33
1848	srs2	0.55	1.22	0.23
1849	aru1	0.55	1.21	0.2
1850	SPAC16C9.02c	0.83	0.96	0.41
1851	SPAC23C4.06c	0.8	0.95	0.43
1852	grx1	0.78	0.98	0.37
1853	SPAC139.01c	0.8	0.94	0.38
1854	lem2	0.76	0.94	0.37
1855	fip1	0.81	1.03	0.3
1856	rad1	0.76	0.98	0.3
1857	vip1	0.7	1.04	0.43
1858	SPAC4H3.01	0.66	1.04	0.39
1859	bqt3	0.67	1.02	0.36
1860	SPAC3F10.09	0.63	1.02	0.34
1861	SPCC1450.12	0.67	1.09	0.25
1862	SPAC4F10.17	0.63	1.11	0.25
1863	ccs1	0.69	1.04	0.31
1864	dcd1	0.68	0.97	0.31
1865	apl3	0.68	0.97	0.31
1866	SPAC1805.14	0.61	0.97	0.27
1867	ssr3	0.62	0.95	0.25
1868	mug10	0.55	1.08	0.34
1869	ggt2	0.48	1.05	0.35
1870	SPAC11D3.16c	0.52	1	0.3
1871	mug113	0.74	1.21	0.18
1872	cig2	0.74	1.21	0.15
1873	rpl1601	0.78	1.25	0.1
1874	SPAC16.01	0.78	1.32	0
1875	hat1	0.54	1.38	0.19
1876	bag102	0.56	1.33	0.12
1877	isu1	0.85	1.11	0.16
1878	pom2	0.85	1.09	0.17
1879	gpt1	0.81	1.11	0.09
1880	SPAC11H11.03c	0.76	1.08	0.17
1881	SPAC19E9.01c	0.77	1.07	0.14
1882	rpl3002	0.77	1.03	0.14
1883	leu1	0.79	0.98	0.21
1884	swi2	0.79	0.96	0.17
1885	SPBC21B10.09	0.81	0.94	0.2
1886	SPBC21D10.09c	0.82	0.92	0.2
1887	cbh1	0.8	0.98	0.1
1888	pol4	0.73	0.99	0.15
1889	imt3	0.74	0.97	0.1
1890	fml1	0.75	1.02	0.05
1891	lys3	0.75	1.04	0
1892	cha4	0.82	0.98	0
1893	his7	0.79	0.94	0
1894	alg10	0.75	0.95	0
1895	clr1	0.57	1.05	0.22
1896	SPAC1D4.01	0.61	1.01	0.16
1897	ppr3	0.62	0.98	0.13
1898	ucp6	0.55	0.97	0.14
1899	SPAC3A11.07	0.66	1.07	0.05
1900	pcr1	0.67	1.08	0
1901	SPAPB1A11.04c	0.67	0.99	0
1902	rhp18	0.54	0.93	0.07
1903	rrf1	0.82	0.84	0.4
1904	SPCC757.02c	0.84	0.83	0.37
1905	epe1	0.78	0.87	0.35
1906	hsp9	0.79	0.81	0.36
1907	ies2	0.82	0.83	0.32
1908	SPACUNK4.10	0.72	0.91	0.38
1909	ura5	0.72	0.87	0.35
1910	SPAC17A5.08	0.69	0.86	0.34
1911	SPAC1527.03	0.72	0.81	0.35
1912	SPBC16G5.17	0.74	0.88	0.27
1913	nrf1	0.77	0.86	0.21
1914	nup124	0.74	0.8	0.26
1915	ddb1	0.73	0.65	0.4
1916	SPAPB21F2.03	0.7	0.66	0.34
1917	SPBC83.16c	0.66	0.7	0.3
1918	myh1	0.71	0.64	0.31
1919	gcs1	0.7	0.62	0.25
1920	crp79	0.63	0.91	0.43
1921	doa10	0.62	0.91	0.41
1922	SPAC9E9.04	0.65	0.9	0.36
1923	meu23	0.67	0.84	0.38
1924	prm1	0.64	0.86	0.37
1925	SPAC25B8.08	0.51	0.81	0.33
1926	SPBC1347.09	0.65	0.88	0.3
1927	SPAC4F8.11	0.61	0.87	0.29
1928	jmj4	0.6	0.85	0.25
1929	SPAC3G6.03c	0.65	0.81	0.3
1930	SPAC823.09c	0.61	0.77	0.28
1931	rnp24	0.66	0.81	0.21
1932	SPAC926.02	0.58	0.85	0.22
1933	SPCC2H8.05c	0.5	0.82	0.3
1934	aph1	0.54	0.85	0.25
1935	rsv2	0.52	0.83	0.27
1936	erv14	0.57	0.75	0.24
1937	srb11	0.56	0.78	0.2
1938	SPAC821.05	0.51	0.7	0.33
1939	SPCP20C8.02c	0.6	0.59	0.39
1940	SPAC57A10.07	0.52	0.61	0.4
1941	SPAC29E6.09	0.51	0.59	0.35
1942	SPAC57A7.09	0.8	0.9	0.1
1943	mug114	0.76	0.85	0.1
1944	lsk1	0.69	0.91	0.15
1945	SPAC823.04	0.7	0.86	0.19
1946	SPBC1D7.01	0.81	0.79	0.12
1947	saf4	0.77	0.78	0.11
1948	SPBC17A3.02	0.76	0.77	0.09
1949	clr4	0.75	0.75	0.15
1950	rhp14	0.75	0.72	0.11
1951	ppk33	0.68	0.89	0
1952	atg5	0.81	0.78	0
1953	SPBC530.05	0.74	0.77	0
1954	mug81	0.73	0.74	0
1955	SPBPB10D8.06c	0.64	0.91	0.15
1956	exo1	0.56	0.91	0.15
1957	spo4	0.58	0.83	0.1
1958	SPBC12C2.07c	0.62	0.87	0.01
1959	hip4	0.58	0.83	0.05
1960	SPBC27B12.06	0.64	0.76	0.08
1961	SPBC947.01	0.55	0.77	0.13
1962	SPBC902.04	0.56	0.74	0.08
1963	cip2	0.54	0.77	0.03
1964	SPAC22H12.03	0.79	0.6	0.01
1965	SPBC405.03c	0.8	0.6	0
1966	snz1	0.62	0.69	0.14
1967	rpl3001	0.68	0.63	0.07
1968	ubp4	0.63	0.62	0.12
1969	SPAC977.12	0.71	0.54	0.13
1970	SPBC18H10.18c	0.71	0.63	0
1971	nep1	0.63	0.69	0
1972	dbp7	0.25	3	0.82
1973	SPAPB24D3.03	0.3	3	0.7
1974	SPAPB1E7.11c	0	3	0.7
1975	SPAPB24D3.08c	0.24	2.62	0.74
1976	SPBP4H10.12	0.32	2.38	0.52
1977	rpl2102	0.31	2.25	0.57
1978	set9	0.37	2	0.61
1979	gcd10	0	2.2	0.71
1980	SPAC328.04	0	1.93	0.81
1981	arb1	0.33	1.73	0.5
1982	rpl1902	0	1.71	0.68
1983	alp14	0	1.64	0.55
1984	SPAC10F6.04	0	1.48	0.55
1985	SPBC1734.09	0	1.42	0.44
1986	ssm4	0.54	1.97	0.11
1987	SPAC18G6.01c	0.42	1.8	0.28
1988	meu29	0.34	1.61	0.31
1989	rpl1002	0.37	1.57	0
1990	SPBC32H8.01c	0.39	1.42	0.1
1991	mrpl39	0	1.85	0.2
1992	rpl803	0	1.71	0.17
1993	vsp20	0	1.66	0.3
1994	gmh3	0	1.58	0.33
1995	rpl44	0	1.54	0.37
1996	psh3	0	1.59	0.21
1997	SPCC306.02c	0.16	1.83	0
[truncated: 613 more rows]
